# Supplementary material for: Equatorial ligand plane perturbations lead to a spin-state change in an iron(iii) porphyrin dimer
Source: Royal Society of Chemistry journal article supplement (doi:10.1039/c9dt01182j), 2019-01-01
Supplement: c9dt01182j1.pdf [file c9dt01182j1.pdf]

## **Electronic Supporting Information**

### **Equatorial ligand plane perturbations lead to a spin-state change in an iron(III) porphyrin dimer**

Firoz Shah Tuglak Khan,<sup>a</sup> Syed Jehanger Shah,<sup>a</sup> Susovan Bhowmik,<sup>a</sup> Fabián G. Cantú Reinhard,<sup>b</sup> Mala A. Sainna,<sup>b</sup> Sam P. de Visser,<sup>\*b</sup> and Sankar Prasad Rath<sup>\*a</sup>

*a. Department of Chemistry, Indian Institute of Technology Kanpur, Kanpur-208016, INDIA. Email: [sprath@iitk.ac.in](mailto:sprath@iitk.ac.in)*

*b. The Manchester Institute of Biotechnology and the School of Chemical Engineering and Analytical Science, The University of Manchester, 131 Princess Street, Manchester M1 7DN, United Kingdom. E-mail: [sam.devissier@manchester.ac.uk](mailto:sam.devissier@manchester.ac.uk)*

|                                                       |                 |
|-------------------------------------------------------|-----------------|
| <b>Part 1: Experimental and computational methods</b> | <b>Page S2</b>  |
| <b>Part 2: Experimental data</b>                      | <b>Page S6</b>  |
| <b>Part 3: Computational studies</b>                  | <b>Page S12</b> |
| <b>3A: Small Model with perchlorate Ligand</b>        | <b>Page S13</b> |
| <b>3B: Small Model with Picrate Ligand</b>            | <b>Page S17</b> |
| <b>3C: Large Model with perchlorate Ligand</b>        | <b>Page S18</b> |
| <b>3D: Large Model with Picrate Ligand</b>            | <b>Page S20</b> |
| <b>Part 4: Computation: Cartesian coordinates</b>     | <b>Page S21</b> |

## Part 1: Experimental and computational methods

### Experimental Section

*Trans*-1,2-bis[(chloro){5-(2,3,7,8,12,13,17,18-octaethylporphyrinyl)}iron(III)]ethane, **2**•Cl was prepared by modifying the literature methods.<sup>1</sup> Reagents and solvents were purchased from commercial sources and purified by standard procedures.

**Synthesis of 2•perchlorate:** 100 mg of **2**•Cl (0.079 mmol) was dissolved in 40 mL benzene and 33 mg (0.158 mmol) AgClO<sub>4</sub> in 2 mL acetonitrile was added to it and stirred at room temperature for 1 hour. The resulting solution was then evaporated to complete dryness. The solid was then dissolved in dichloromethane and the insoluble AgCl was filtered off. The filtrate thus obtained was then evaporated to dryness. The resulting solid was dissolved in minimum volume of dry CH<sub>2</sub>Cl<sub>2</sub> and then carefully layered with benzene. On standing for 4–5 days, dark brown crystalline solid was formed which was collected by filtration and dried in vacuum. Yield: 90 mg (81%). **Caution!** Perchlorate salts are potentially explosive when heated or shocked. Handle them in milligram quantities with care. Yield: 91 mg, (77%). Anal. Calcd (found): C, 63.48 (63.70); H, 6.37 (6.55); N, 8.00 (8.15). UV-vis (dichloromethane) [ $\lambda_{\max}$ , nm ( $\epsilon$ , M<sup>-1</sup> cm<sup>-1</sup>): 394 (1.4 × 10<sup>5</sup>), 492 (3.1 × 10<sup>4</sup>), 545 (1.1 × 10<sup>4</sup>), 640 (5.1 × 10<sup>3</sup>). <sup>1</sup>H NMR (CDCl<sub>3</sub>, 295 K): *meso*-H: -3.9, -15.7; -CH<sub>3</sub>: 2.6, 2.7, 2.8; -CH<sub>2</sub>: 16.0, 16.7, 17.2, 17.9, 18.1, 18.7, 19.2, 21.4; -CH(b): 33.6 ppm. Mössbauer: ( $\alpha$ -Fe, 295 K):  $\delta$  = 0.28 mm s<sup>-1</sup>,  $\Delta E_Q$  = 2.67 mm s<sup>-1</sup>.

**Synthesis of 2•picrate:** 100 mg (0.079 mmol) of **2**•Cl was dissolved in 50 mL dichloromethane. 40 mg (0.174 mmol) 2,4,6-trinitrophenol in 2 mL dichloromethane was added to it and the was then refluxed for 30 min. The resulting solution was evaporated to complete dryness. The solid thus obtained was dissolved in minimum volume of dichloromethane, filtered to remove any solid residue and carefully layered with acetonitrile which was then kept for slow diffusion in air at room temperature. On standing for 5–6 days, dark brown crystalline solid was formed which was then collected by filtration, washed well with the mother liquor and dried in vacuum. Yield: 98 mg, (75%). Anal. Calcd (found): C, 62.32 (62.51); H, 5.59 (5.75); N, 11.83 (11.95). UV-vis (dichloromethane) [ $\lambda_{\max}$ , nm ( $\epsilon$ , M<sup>-1</sup> cm<sup>-1</sup>): 368 (1.9 × 10<sup>5</sup>), 516 (2.8 × 10<sup>4</sup>), 547 (2.2 × 10<sup>4</sup>), 653 (1.1 × 10<sup>4</sup>). EPR data: in solid (120 K),  $g_{\perp}$  = 6.02 and  $g_{\parallel}$  = 2.01; in dichloromethane (120 K),  $g_{\perp}$  =

6.05 and  $g_{\parallel} = 1.97$ .  $^1\text{H}$  NMR ( $\text{CDCl}_3$ , 295 K): *meso-H*: -22.0, -43.7;  $-\text{CH}_3$ : 5.9, 6.7, 7.7, 8.4;  $-\text{CH}_2$ : 35.5, 38.2, 39.1, 50.2, 51.5, 51.9, 53.2, 55.4;  $-\text{CH}_2(\text{b})$ : 109.5;  $m_t$  -*H*: 52.4 ppm. Mössbauer: ( $\alpha$ -Fe, 295 K):  $\delta = 0.30 \text{ mm s}^{-1}$ ,  $\Delta E_Q = 0.58 \text{ mm s}^{-1}$ .

### Instrumentation

UV-vis spectra were recorded on a PerkinElmer UV/Vis spectrometer.  $^{57}\text{Fe}$  Mössbauer spectra were recorded using a Wissel 1200 spectrometer and a proportional counter.  $^{57}\text{Co}(\text{Rh})$  in a constant acceleration mode was used as the radioactive source. Isomer shifts ( $\delta$ ) are given related to  $\alpha$ -iron foil at room temperature. Elemental (C, H, and N) analyses were performed on a PerkinElmer 2400II elemental analyzer. Electron paramagnetic resonance (EPR) spectra were obtained on a Bruker EMX EPR spectrometer. EPR spectral simulations were carried out using the Easy Spin software.<sup>2</sup> Magnetic susceptibility data were collected using a Quantum Design MPMS SQUID magnetometer over the temperature range 5 to 300 K. Data were collected in applied magnetic field of 0.2 T and corrected for diamagnetism using Pascal's constants.  $^1\text{H}$  NMR spectra were recorded on a JEOL 500 MHz instrument. The spectra for paramagnetic molecules were recorded over a 100-kHz bandwidth with 64 K data points and a 5-ms  $90^\circ$  pulse. For a typical spectrum between 2000 and 3000 transients were accumulated with a 50- $\mu\text{s}$  delay time. The residual  $^1\text{H}$  resonances of the solvents were used as a secondary reference.

### X-ray Structure Solution and Refinement

Single-crystal X-ray data were collected at 100 K on a Bruker SMART APEX CCD diffractometer equipped with CRYO Industries low temperature apparatus and intensity data were collected using graphite-monochromated  $\text{MoK}\alpha$  radiation ( $\lambda = 0.71073 \text{ \AA}$ ). The data integration and reduction were processed with SAINT software.<sup>3</sup> An absorption correction was applied.<sup>4</sup> The structure was solved by the direct method using SHELXS-97 and was refined on F2 by full-matrix least-squares technique using the SHELXL-2014 program package.<sup>5</sup> Non-hydrogen atoms were refined anisotropically. In the refinement, hydrogens were treated as riding atoms using SHELXL default parameters. Crystal data and data collection parameters are given in Table S2.

### Computational modeling

Following previously benchmarked methods,<sup>6</sup> we utilized the OPBE<sup>7</sup> density functional theory (DFT) method for geometry optimizations and frequencies in the gas phase for structures **1•X**, **2•X**, **1A•X**, **2A•X** with perchlorate and picrate as axial ligand (X). Thus, our initial calculations utilized an abbreviated system with all substituents of the two porphyrin residues set to hydrogen atoms (models **1A•X** and **2A•X** representing the ethane-bridged and ethene-bridged dimers, respectively). In addition, we studied the full models (models **1•X** and **2•X**, Scheme S1) for a selection of methods and spin states. All structures were geometry minimized without constraints using a double- $\zeta$  quality LACVP basis set on iron with electron core-potential and 6-31G\* on the rest of the atoms: basis set BS1.<sup>8</sup> All calculations are the result of a full geometry optimization on the overall  $S = 1$  spin states with individual metal spin state  $S = (3/2, -3/2)$  or  $S = (5/2, -5/2)$  and a frequency calculation confirms the structures as local minima. In addition, the maximum (ferromagnetic) spin states were calculated as well, i.e.  $S = (3/2, 3/2)$  and  $S = (5/2, 5/2)$ . All calculations for complexes **1•X**, **2•X**, **1A•X**, **2A•X** were run in Gaussian-09.<sup>9</sup>

To test the effect of spin state on structure, model size, energetics and environmental factors, we ran a number of exploratory calculations on models **1A•X** and **2A•X** with the BS1 basis set. Firstly, the effect of the density functional methods on the relative energies of the spin state ordering of the  $S = (3/2, 3/2)$ ,  $(3/2, 5/2)$  and  $(5/2, 5/2)$  spin states was investigated through full geometry optimizations at the OPBE,<sup>7</sup> PBE0,<sup>10</sup> B98,<sup>11</sup> and BP86<sup>12</sup> functionals in the presence of an implicit solvent model mimicking water. In all cases the same spin-state ordering is obtained, although there is some fluctuation in the relative energies. In addition, inclusion of a solvent model does not affect the spin state energies with respect to the gas-phase either.

On some structures, the energetics was improved by single point calculations on all structures using the 6-311+G\*\* basis set for all atoms: basis set BS2. Finally a single point using basis set def2-TZVP with the functional TPSSH<sup>13</sup> was performed on all geometries: BS3.

## References:

1. S. K. Ghosh, R. Patra and S. P. Rath, *Inorg. Chim. Acta*, 2010, **363**, 2791-2799.
2. S. Stoll, A. Schweiger, *J. Magn. Reson.*, **2006**, *178*, 42.
3. SAINT+, 6.02 ed., Bruker AXS, Madison, WI, **1999**.

4. G. M. Sheldrick, SADABS 2.0, **2000**.
5. G. M. Sheldrick, *SHELXL-2014: Program for Crystal Structure Refinement*; University of Göttingen: Göttingen, Germany, **2014**.
6. M. A. Sainna, D. Sil, D. Sahoo, B. Martin, S. P. Rath, P. Comba and S. P. de Visser, *Inorg. Chem.*, 2015, **54**, 1919.
7. J. P. Perdew, K. Burke and M. Ernzerhof, *Phys. Rev. Lett.*, 1997, **78**, 1396.
8. P. J. Hay and W. R. Wadt, *J. Chem. Phys.*, 1985, **82**, 270.
9. Gaussian 09, Revision D.01, M. J. Frisch, G. W. Trucks, H. B. Schlegel, G. E. Scuseria, M. A. Robb, J. R. Cheeseman, G. Scalmani, V. Barone, B. Mennucci, G. A. Petersson, H. Nakatsuji, M. Caricato, X. Li, H. P. Hratchian, A. F. Izmaylov, J. Bloino, G. Zheng, J. L. Sonnenberg, M. Hada, M. Ehara, K. Toyota, R. Fukuda, J. Hasegawa, M. Ishida, T. Nakajima, Y. Honda, O. Kitao, H. Nakai, T. Vreven, J. A. Montgomery, Jr., J. E. Peralta, F. Ogliaro, M. Bearpark, J. J. Heyd, E. Brothers, K. N. Kudin, V. N. Staroverov, R. Kobayashi, J. Normand, K. Raghavachari, A. Rendell, J. C. Burant, S. S. Iyengar, J. Tomasi, M. Cossi, N. Rega, J. M. Millam, M. Klene, J. E. Knox, J. B. Cross, V. Bakken, C. Adamo, J. Jaramillo, R. Gomperts, R. E. Stratmann, O. Yazyev, A. J. Austin, R. Cammi, C. Pomelli, J. W. Ochterski, R. L. Martin, K. Morokuma, V. G. Zakrzewski, G. A. Voth, P. Salvador, J. J. Dannenberg, S. Dapprich, A. D. Daniels, Ö. Farkas, J. B. Foresman, J. V. Ortiz, J. Cioslowski and D. J. Fox, Gaussian, Inc., Wallingford CT, 2009.
10. C. Adamo and V. Barone, *J. Chem. Phys.*, 1999, **110**, 6158.
11. (a) A. D. Becke, *J. Chem. Phys.*, 1997, **107**, 8554; (b) H. L. Schmider and A. D. Becke, *J. Chem. Phys.*, 1998, **108**, 9624.
12. (a) A. D. Becke, *Phys. Rev. A*, 1988, **38**, 3098; (b) J. P. Perdew, *Phys. Rev. B*, 1986, **33**, 8822.
13. J. M. Tao, J. P. Perdew, V. N. Staroverov and G. E. Scuseria, *Phys. Rev. Lett.*, 2003, **91**, 146401.

## Part 2: Experimental data

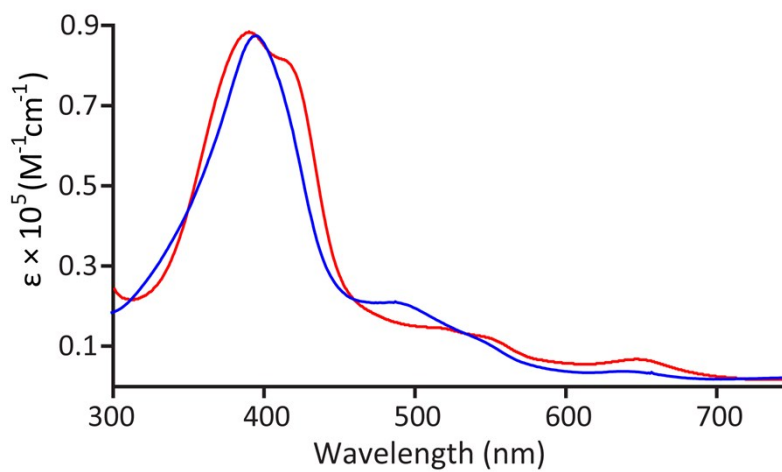

**Fig. S1.** UV-visible spectra (in dichloromethane at 295 K) of **1•perchlorate** (red line), and **2•perchlorate** (blue line).

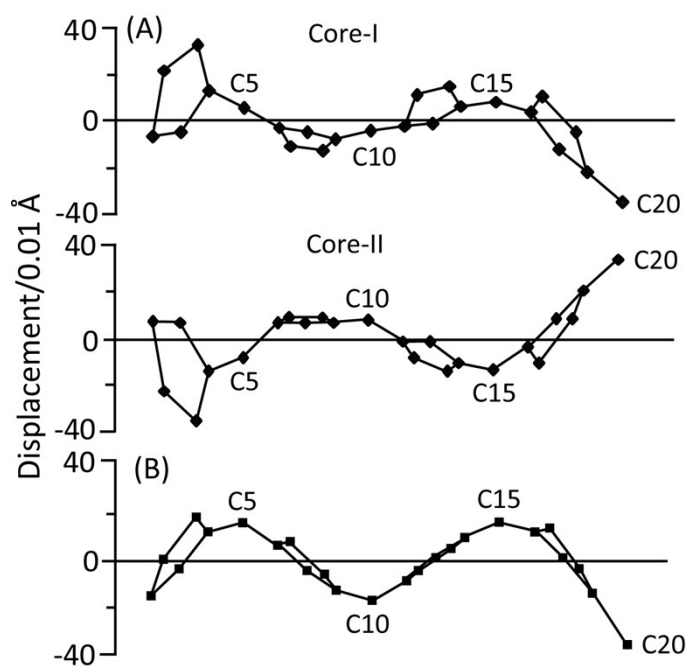

**Fig. S2.** Out-of-plane displacements (in units of  $0.01 \text{ \AA}$ ) of the porphyrin core atoms of (A) **1•perchlorate**, and (B) **2•perchlorate** from the mean plane of the  $\text{C}_{20}\text{N}_4$  porphyrinato core. The horizontal axes show the bond connectivity between atoms.

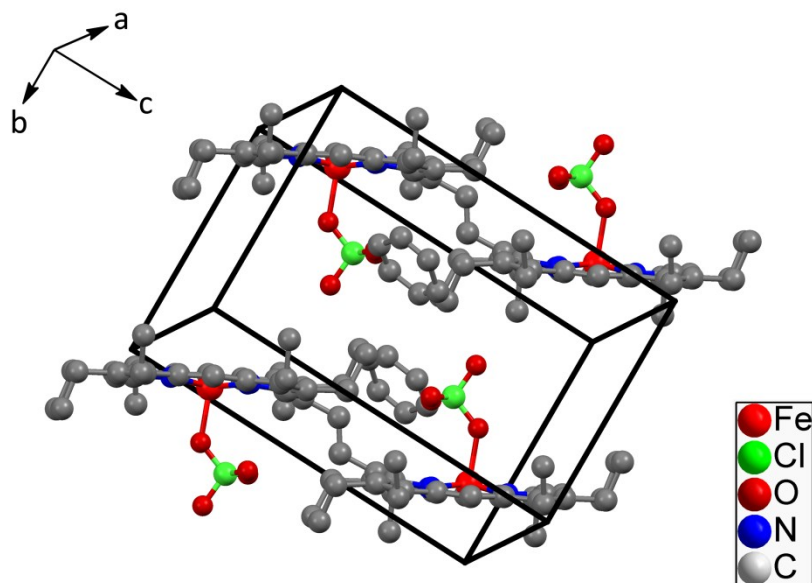

**Fig. S3.** Diagram illustrating the molecular packing of 2•perchlorate.2C<sub>6</sub>H<sub>6</sub> at 100 K (hydrogen atoms have been omitted for clarity).

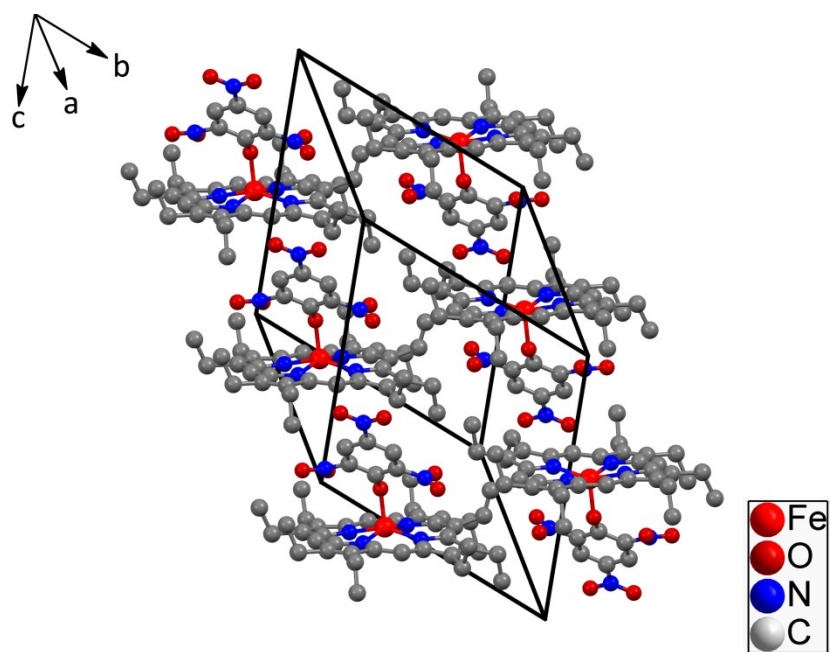

**Fig. S4.** Diagram illustrating the molecular packing of 2•picrate at 100 K (hydrogen atoms have been omitted for clarity).

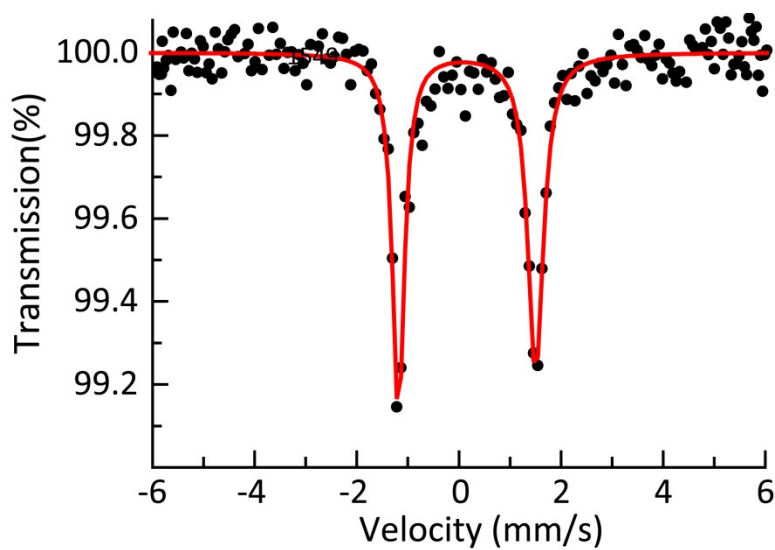

**Fig. S5.** Zero-field Mössbauer spectrum (at 100 K) of microcrystalline sample of **2**•perchlorate.

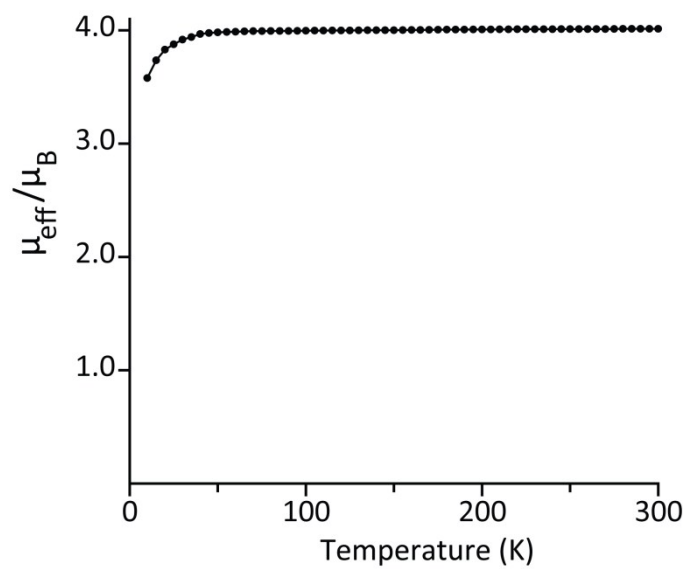

**Fig. S6.** Magnetic moment per iron center of crystalline sample of **2**•perchlorate as a function of temperature.



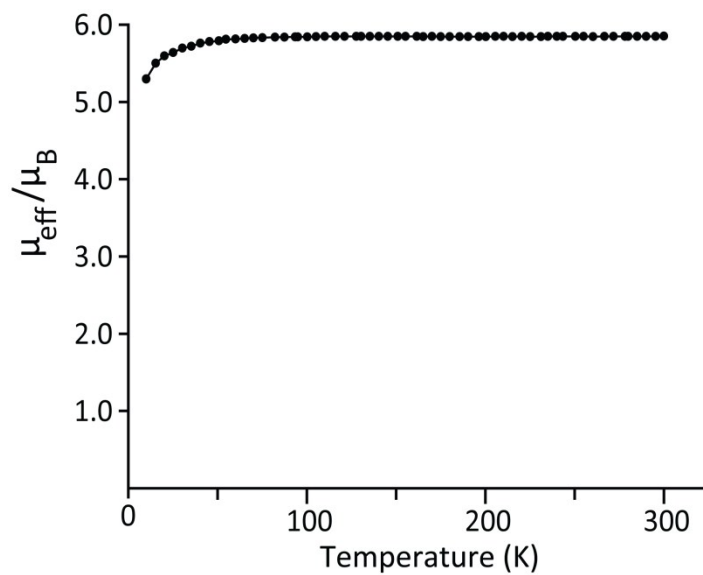

**Fig. S7.** Magnetic moment per iron center of crystalline sample of **2**•picrate as a function of temperature.

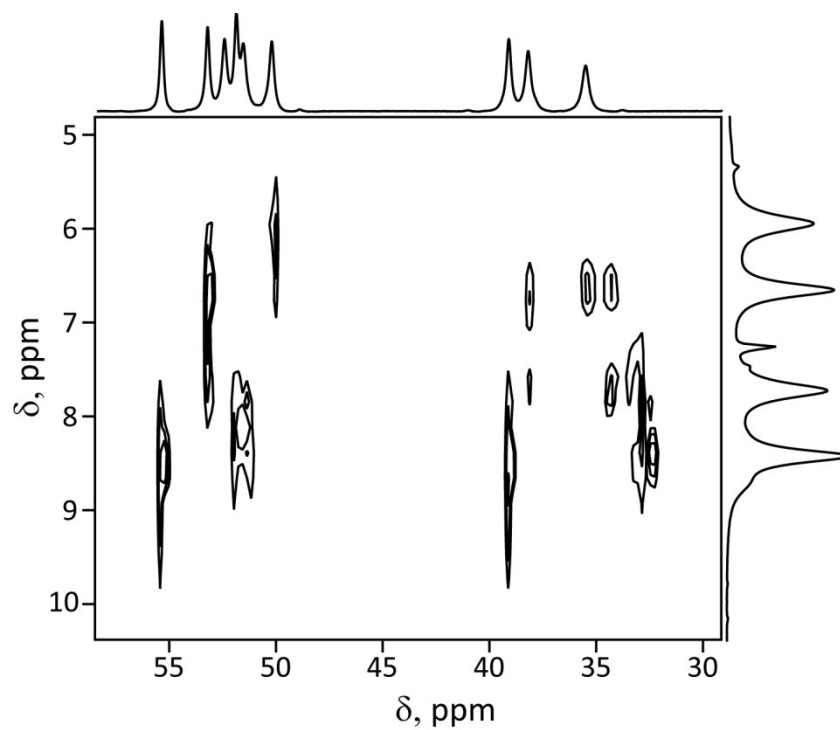

**Fig. S8.**  $^1\text{H}$ - $^1\text{H}$  COSY (500 MHz) spectrum (in  $\text{CDCl}_3$  at 295 K) of **2**•picrate.

**Table S1.** Selected Bond Distances (Å) and Bond angles (°)

| Bond distances | <b>2</b> •perchlorate.2C <sub>6</sub> H <sub>6</sub> | <b>2</b> •picrate |
|----------------|------------------------------------------------------|-------------------|
| Fe1–N1         | 1.989(4)                                             | 2.037(3)          |
| Fe1–N2         | 2.000(4)                                             | 2.044(3)          |
| Fe1–N3         | 2.003(4)                                             | 2.056(3)          |
| Fe1–N4         | 2.004(4)                                             | 2.051(3)          |
| Fe1–O1         | 2.056(4)                                             | 1.915(3)          |
| N1–Fe1–N2      | 90.00(16)                                            | 89.01(13)         |
| N1–Fe1–N3      | 165.36(16)                                           | 160.25(14)        |
| N1–Fe1–N4      | 87.80(16)                                            | 86.89(13)         |
| N2–Fe1–N3      | 88.08(16)                                            | 87.25(14)         |
| N2–Fe1–N4      | 165.43(17)                                           | 155.81(14)        |
| N3–Fe1–N4      | 90.42(16)                                            | 88.61(13)         |
| N1–Fe1–O1      | 102.08(15)                                           | 102.76(12)        |
| N2–Fe1–O1      | 95.56(15)                                            | 99.13(13)         |
| N3–Fe1–O1      | 92.55(15)                                            | 96.98(13)         |
| N4–Fe1–O1      | 98.99(15)                                            | 105.03(13)        |

**Table S2.** Crystallographic Data and Data Collection Parameters

|                                                 | <b>2•perchlorate.2C<sub>6</sub>H<sub>6</sub></b>                                               | <b>2•picrate</b>                                                                |
|-------------------------------------------------|------------------------------------------------------------------------------------------------|---------------------------------------------------------------------------------|
| Formula                                         | C <sub>86</sub> H <sub>100</sub> Cl <sub>2</sub> Fe <sub>2</sub> N <sub>8</sub> O <sub>8</sub> | C <sub>86</sub> H <sub>92</sub> Fe <sub>2</sub> N <sub>14</sub> O <sub>14</sub> |
| <i>T</i> (K)                                    | 100(2)                                                                                         | 100(2)                                                                          |
| Formula weight                                  | 1556.33                                                                                        | 1657.43                                                                         |
| Crystal system                                  | Triclinic                                                                                      | Triclinic                                                                       |
| Space group                                     | <i>P</i> -1                                                                                    | <i>P</i> -1                                                                     |
| <i>a</i> , Å                                    | 10.8619(12)                                                                                    | 12.077(5)                                                                       |
| <i>b</i> , Å                                    | 13.5788(15)                                                                                    | 13.443(5)                                                                       |
| <i>c</i> , Å                                    | 15.2373(18)                                                                                    | 14.103(5)                                                                       |
| $\alpha$ , deg                                  | 64.626(2)                                                                                      | 62.358(5)                                                                       |
| $\beta$ , deg                                   | 78.507(2)                                                                                      | 74.156(5)                                                                       |
| $\gamma$ , deg                                  | 71.060(2)                                                                                      | 72.733(5)                                                                       |
| <i>V</i> , Å <sup>3</sup>                       | 1915.9(4)                                                                                      | 1912.0(13)                                                                      |
| <i>Z</i>                                        | 1                                                                                              | 1                                                                               |
| Radiation ( $\lambda$ , Å)                      | Mo K $\alpha$ (0.71073)                                                                        | Mo K $\alpha$ (0.71073)                                                         |
| <i>d</i> <sub>calcd.</sub> , g•cm <sup>-3</sup> | 1.349                                                                                          | 1.439                                                                           |
| <i>F</i> (000)                                  | 822                                                                                            | 870                                                                             |
| Crystal size (mm <sup>3</sup> )                 | 0.26 x 0.20 x 0.16 mm <sup>3</sup>                                                             | 0.18 x 0.14 x 0.10 mm <sup>3</sup>                                              |
| Theta range for data collection                 | 1.724 to 25.497°                                                                               | 2.236 to 25.498°                                                                |
| $\mu$ , mm <sup>-1</sup>                        | 0.512                                                                                          | 0.458                                                                           |
| No of unique data                               | 7006                                                                                           | 7129                                                                            |
| Completeness to theta                           | 98.4%                                                                                          | 99.7%                                                                           |
| No. of restraints                               | 0                                                                                              | 0                                                                               |
| No. of params. refined                          | 486                                                                                            | 531                                                                             |
| GOF on <i>F</i> <sup>2</sup>                    | 1.027                                                                                          | 1.039                                                                           |
| <i>R</i> 1 <sup>a</sup> [ $> 2\sigma(I)$ ]      | 0.0691                                                                                         | 0.0664                                                                          |
| <i>R</i> 1 <sup>a</sup> (all data)              | 0.1106                                                                                         | 0.1112                                                                          |
| w <i>R</i> 2 <sup>b</sup> (all data)            | 0.1998                                                                                         | 0.1770                                                                          |
| Largest diff. peak and hole                     | 1.118 and -0.738 eÅ <sup>-3</sup>                                                              | 1.271 and -0.384 eÅ <sup>-3</sup>                                               |

$${}^a R1 = \frac{\sum ||F_o| - |F_c||}{\sum |F_o|} ; {}^b wR2 = \sqrt{\frac{\sum [w(F_o^2 - F_c^2)^2]}{\sum [w(F_o^2)^2]}}$$

**Part 3: Computational Studies:**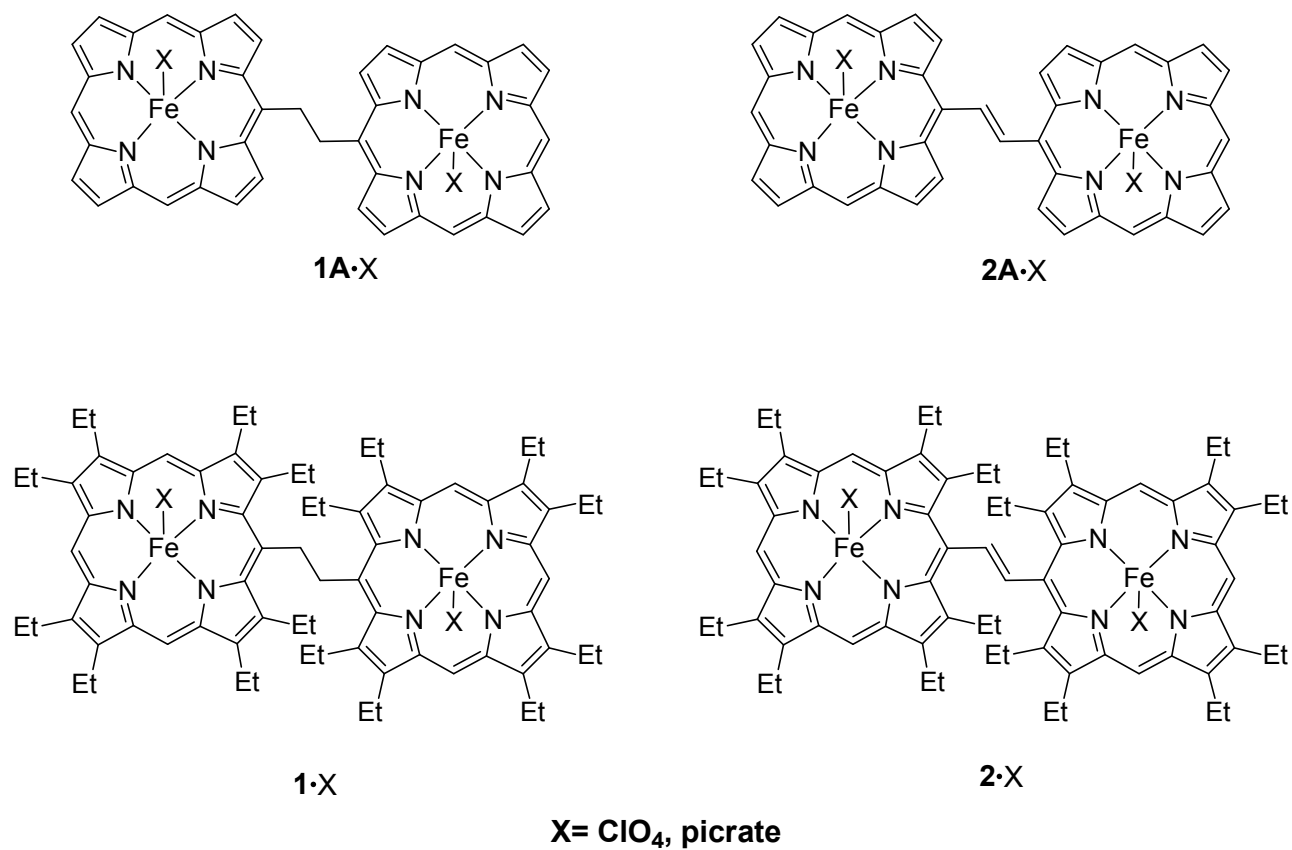**Scheme S1:** Models investigated in this work.

### Part 3A: Small Model with Perchlorate Ligand

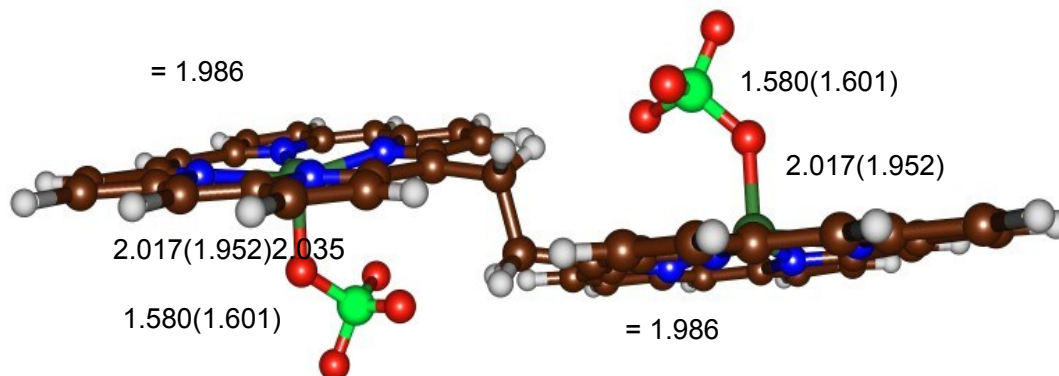

**Fig. S9.** Optimized geometries (distances in Å) in the gas phase of  ${}^1\mathbf{1A}\cdot\text{perchlorate } \{3/2\}$  ( ${}^1\mathbf{1A}\cdot\text{perchlorate } \{5/2\}$ ) as obtained at UOPBE/BS1 in Gaussian.

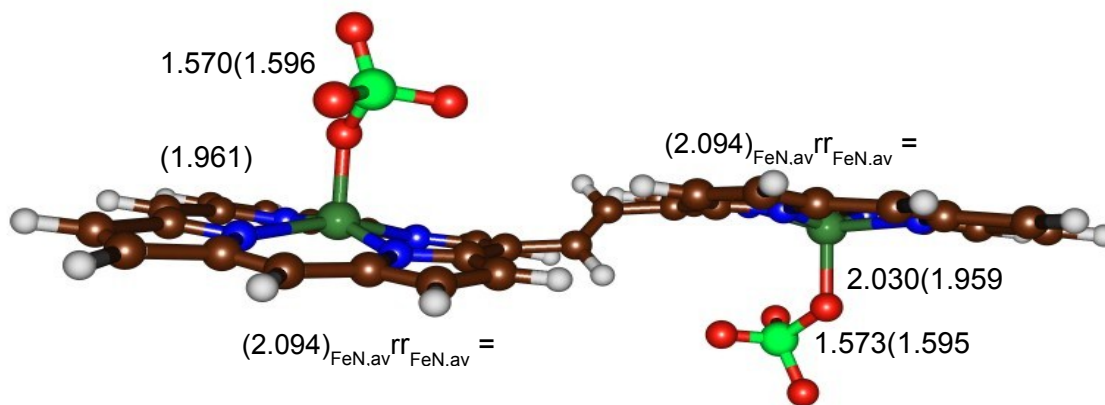

**Fig. S10.** Optimized geometries (distances in Å) of  ${}^1\mathbf{2A}\cdot\text{perchlorate } \{3/2\}$  ( ${}^1\mathbf{2A}\cdot\text{perchlorate } \{5/2\}$ ) as obtained at UOPBE/BS1 in Gaussian.

**Table S3: Absolute [in au] and relative [in kcal mol<sup>-1</sup>] energies of optimized spin state structures as calculated at OPBE/BS1, OPBE/BS2, and TPSSh/BS3. Data obtained in the gas-phase.**

**(a) OPBE/BS1 data:**

| BS1                               | E [au]       | E+ZPE [au]   | G [au]       | $\Delta E$ | $\Delta E+ZPE$ | $\Delta G$ |
|-----------------------------------|--------------|--------------|--------------|------------|----------------|------------|
| <sup>1</sup> 1A•perchlorate {3/2} | -3822.009934 | -3821.395840 | -3821.485220 | 0.00       | 0.00           | 0.28       |
| <sup>1</sup> 1A•perchlorate {5/2} | -3822.005089 | -3821.394429 | -3821.485669 | 3.04       | 0.89           | 0.00       |
| <sup>1</sup> 2A•perchlorate {3/2} | -3820.784618 | -3820.195120 | -3820.284860 | 0.00       | 0.00           | 1.04       |
| <sup>1</sup> 2A•perchlorate {5/2} | -3820.780653 | -3820.194476 | -3820.286520 | 2.49       | 0.40           | 0.00       |

**(b) OPBE/BS2 data:**

| BS2                               | E [au]       | ZPE [au]     | G [au]       | $\Delta E$ | $\Delta E+ZPE$ | $\Delta G$ |
|-----------------------------------|--------------|--------------|--------------|------------|----------------|------------|
| <sup>1</sup> 1A•perchlorate {3/2} | -6103.788366 | -6103.174272 | -6103.263652 | 0.00       | 0.00           | 0.00       |
| <sup>1</sup> 1A•perchlorate {5/2} | -6103.782618 | -6103.171958 | -6103.263198 | 3.61       | 1.45           | 0.28       |
| <sup>1</sup> 2A•perchlorate {3/2} | -6102.563591 | -6101.974093 | -6102.063833 | 0.00       | 0.00           | 0.00       |
| <sup>1</sup> 2A•perchlorate {5/2} | -6102.557402 | -6101.971225 | -6102.063269 | 3.88       | 1.80           | 0.35       |

**(c) TPSSh/BS3 data:**

| BS3                               | E [au]       | ZPE [au]     | G [au]       | $\Delta E$ | $\Delta E+ZPE$ | $\Delta G$ |
|-----------------------------------|--------------|--------------|--------------|------------|----------------|------------|
| <sup>1</sup> 1A•perchlorate {3/2} | -6104.703442 | -6104.089348 | -6104.178728 | 0.00       | 0.00           | 0.00       |
| <sup>1</sup> 1A•perchlorate {5/2} | -6104.680502 | -6104.069842 | -6104.161082 | 14.39      | 12.24          | 11.07      |
| <sup>1</sup> 2A•perchlorate {3/2} | -6103.476286 | -6102.886789 | -6102.976529 | 0.00       | 0.00           | 0.00       |
| <sup>1</sup> 2A•perchlorate {5/2} | -6103.451814 | -6102.865637 | -6102.957681 | 15.36      | 13.27          | 11.83      |

**Table S4: Absolute [in au] and relative [in kcal mol<sup>-1</sup>] energies of optimized spin state structures as calculated at OPBE/BS1, PBE0/BS1, B98/BS1, and BP86/BS1. Data obtained with a dielectric constant mimicking water included.**

| OPBE/BS1                     | E [au]      | E+ZPE [au]  | G [au]      | $\Delta E$ | $\Delta E+ZPE$ | $\Delta G$ |
|------------------------------|-------------|-------------|-------------|------------|----------------|------------|
| <sup>11</sup> 1A•perchlorate | -3822.04828 | -3821.43825 | -3821.53237 | 8.40       | 6.17           | 5.67       |
| <sup>9</sup> 1A•perchlorate  | -3822.05492 | -3821.44278 | -3821.53472 | 4.23       | 3.33           | 4.20       |
| <sup>7</sup> 1A•perchlorate  | -3822.06166 | -3821.44808 | -3821.54140 | 0.00       | 0.00           | 0.00       |
| <sup>11</sup> 2A•perchlorate | -3820.82511 | -3820.23890 | -3820.32982 | 8.26       | 6.40           | 6.86       |
| <sup>9</sup> 2A•perchlorate  | -3820.83222 | -3820.24432 | -3820.33541 | 3.80       | 2.99           | 3.35       |
| <sup>7</sup> 2A•perchlorate  | -3820.83827 | -3820.24909 | -3820.34076 | 0.00       | 0.00           | 0.00       |

| PBE0/BS1                     | E [au]      | E+ZPE [au]  | G [au]      | $\Delta E$ | $\Delta E+ZPE$ | $\Delta G$ |
|------------------------------|-------------|-------------|-------------|------------|----------------|------------|
| <sup>11</sup> 1A•perchlorate | -3819.30867 | -3818.68249 | -3818.77351 | 7.86       | 5.68           | 4.19       |
| <sup>9</sup> 1A•perchlorate  | -3819.31505 | -3818.68707 | -3818.77668 | 3.86       | 2.81           | 2.19       |
| <sup>7</sup> 1A•perchlorate  | -3819.32121 | -3818.69155 | -3818.78018 | 0.00       | 0.00           | 0.00       |
| <sup>11</sup> 2A•perchlorate | -3818.08520 | -3817.48352 | -3817.57443 | 7.61       | 5.53           | 3.98       |
| <sup>9</sup> 2A•perchlorate  | -3818.09155 | -3817.48819 | -3817.57629 | 3.62       | 2.60           | 2.81       |
| <sup>7</sup> 2A•perchlorate  | -3818.09732 | -3817.49233 | -3817.58077 | 0.00       | 0.00           | 0.00       |

| B98/BS1                      | E [au]      | E+ZPE [au]  | G [au]      | $\Delta E$ | $\Delta E+ZPE$ | $\Delta G$ |
|------------------------------|-------------|-------------|-------------|------------|----------------|------------|
| <sup>11</sup> 1A•perchlorate | -3821.44193 | -3820.82842 | -3820.92004 | 20.60      | 15.87          | 14.85      |
| <sup>9</sup> 1A•perchlorate  | -3821.45838 | -3820.84190 | -3820.93138 | 10.28      | 7.41           | 7.73       |
| <sup>7</sup> 1A•perchlorate  | -3821.47476 | -3820.85370 | -3820.94370 | 0.00       | 0.00           | 0.00       |
| <sup>11</sup> 2A•perchlorate | -3820.21698 | -3819.62535 | -3819.71385 | 19.27      | 16.11          | 16.38      |
| <sup>9</sup> 2A•perchlorate  | -3820.23443 | -3819.64138 | -3819.73100 | 8.32       | 6.05           | 5.62       |
| <sup>7</sup> 2A•perchlorate  | -3820.24769 | -3819.65102 | -3819.73996 | 0.00       | 0.00           | 0.00       |

| BP86/BS1                             | E [au]      | E+ZPE [au]  | G [au]      | $\Delta E$ | $\Delta E+ZPE$ | $\Delta G$ |
|--------------------------------------|-------------|-------------|-------------|------------|----------------|------------|
| <sup>11</sup> <b>1A</b> •perchlorate | -3822.94790 | -3822.35107 | -3822.44766 | 30.40      | 27.32          | 24.65      |
| <sup>9</sup> <b>1A</b> •perchlorate  | -3822.97196 | -3822.37225 | -3822.46492 | 15.30      | 14.03          | 13.81      |
| <sup>7</sup> <b>1A</b> •perchlorate  | -3822.99634 | -3822.39461 | -3822.48693 | 0.00       | 0.00           | 0.00       |
| <sup>11</sup> <b>2A</b> •perchlorate | -3821.72747 | -3821.15386 | -3821.24940 | 29.89      | 27.25          | 24.81      |
| <sup>9</sup> <b>2A</b> •perchlorate  | -3821.75172 | -3821.17590 | -3821.26858 | 14.67      | 13.42          | 12.77      |
| <sup>7</sup> <b>2A</b> •perchlorate  | -3821.77511 | -3821.19729 | -3821.28893 | 0.00       | 0.00           | 0.00       |



**Part 3B: Small Model with picrate Ligand**

**Table S5: Absolute [in au] and relative [in kcal mol<sup>-1</sup>] energies of optimized spin state structures as calculated at OPBE/BS1, and picrate ligand.**

| BS1                                  | E [au]       | ZPE [au] | G [au]       | $\Delta E$ | $\Delta E + ZPE$ | $\Delta G$ |
|--------------------------------------|--------------|----------|--------------|------------|------------------|------------|
| <sup>11</sup> <b>1A</b> •picrate     | -4140.825627 | 0.777478 | -4140.166590 | 0.58       | -1.38            | -3.24      |
| <sup>1</sup> <b>1A</b> •picrate{3/2} | -4140.826546 | 0.780600 | -4140.161432 | 0.00       | 0.00             | 0.00       |
| <sup>7</sup> <b>1A</b> •picrate      | -4140.828906 | 0.780389 | -4140.161771 | -1.48      | -1.61            | -0.21      |
| <sup>11</sup> <b>2A</b> •picrate     | -4139.607226 | 0.753557 | -4138.970051 | 0.22       | -1.56            | -4.60      |
| <sup>1</sup> <b>2A</b> •picrate{3/2} | -4139.607581 | 0.756406 | -4138.962716 | 0.00       | 0.00             | 0.00       |
| <sup>7</sup> <b>2A</b> •picrate      | -4139.608106 | 0.756675 | -4138.965073 | -0.33      | -0.16            | -1.48      |

## Part 3C: Large Model with perchlorate Ligand

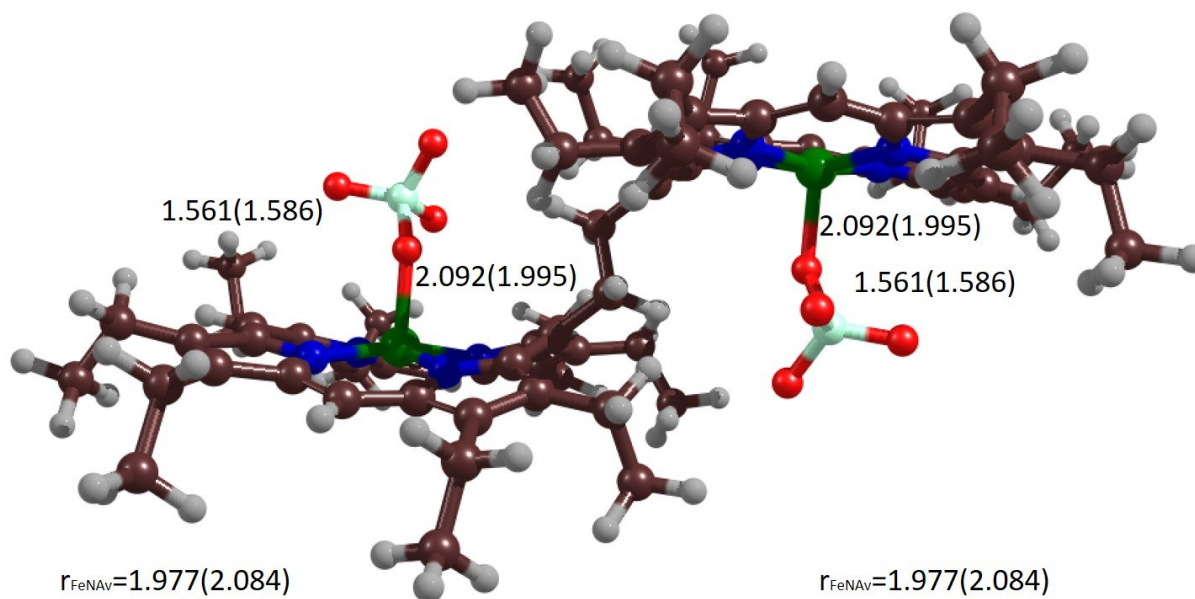

**Fig. S11:** Optimized geometries (distances in Å) of  $^1\mathbf{1}\cdot\text{perchlorate } \{3/2\}$  ( $^1\mathbf{1}\cdot\text{perchlorate } \{5/2\}$ ) as obtained at UOPBE/BS1 in Gaussian.

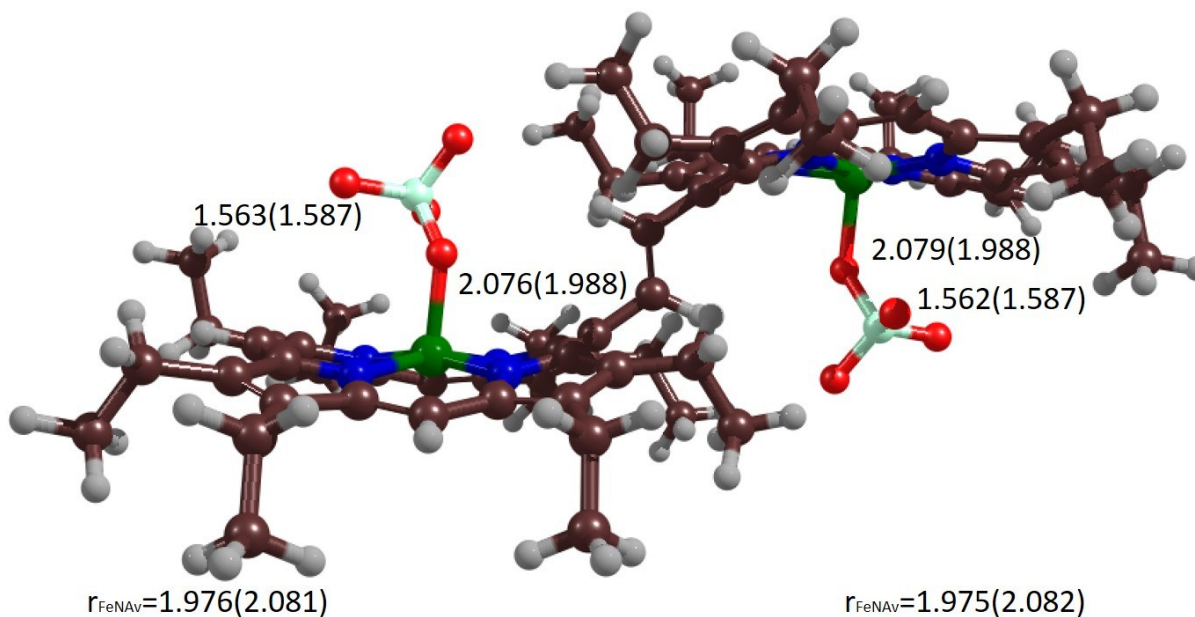

**Fig. S12:** Optimized geometries (distances in Å) of  $^1\mathbf{2}\cdot\text{perchlorate } \{3/2\}$  ( $^1\mathbf{2}\cdot\text{perchlorate } \{5/2\}$ ) as obtained at UOPBE/BS1 in Gaussian.

**Table S6: Absolute [in au] and relative [in kcal mol<sup>-1</sup>] energies of optimized spin state structures as calculated at OPBE/BS1, OPBE/BS2, and TPSSh/BS3.**

| BS1                                 | E [au]      | E+ZPE [au]  | G [au]      | $\Delta E$ | $\Delta E+ZPE$ | $\Delta G$ |
|-------------------------------------|-------------|-------------|-------------|------------|----------------|------------|
| <sup>1</sup> 1•perchlorate<br>{3/2} | -5079.50983 | -5077.99619 | -5078.14247 | 0.00       | 0.00           | 0.00       |
| <sup>1</sup> 1•perchlorate<br>{5/2} | -5079.49975 | -5077.98921 | -5078.13594 | 6.32       | 4.38           | 4.10       |
| <sup>1</sup> 2•perchlorate<br>{3/2} | -5078.29344 | -5076.80411 | -5076.94707 | 0.00       | 0.00           | 0.00       |
| <sup>1</sup> 2•perchlorate<br>{5/2} | -5078.28304 | -5076.79778 | -5076.94412 | 6.53       | 3.98           | 1.85       |

| BS2                                 | E [au]       | E+ZPE [au]   | G [au]       | $\Delta E$ | $\Delta E+ZPE$ | $\Delta G$ |
|-------------------------------------|--------------|--------------|--------------|------------|----------------|------------|
| <sup>1</sup> 1•perchlorate<br>{3/2} | -7361.683904 | -7360.170266 | -7360.316544 | 0.00       | 0.00           | 0.00       |
| <sup>1</sup> 1•perchlorate<br>{5/2} | -7361.673236 | -7360.162690 | -7360.309422 | 6.69       | 4.75           | 4.47       |
| <sup>1</sup> 2•perchlorate<br>{3/2} | -7360.466726 | -7358.977405 | -7359.120364 | 0.00       | 0.00           | 0.00       |
| <sup>1</sup> 2•perchlorate<br>{5/2} | -7360.456147 | -7358.970889 | -7359.117234 | 6.64       | 4.09           | 1.96       |

| BS3                                 | E [au]       | E+ZPE [au]   | G [au]       | $\Delta E$ | $\Delta E+ZPE$ | $\Delta G$ |
|-------------------------------------|--------------|--------------|--------------|------------|----------------|------------|
| <sup>1</sup> 1•perchlorate<br>{3/2} | -7363.289879 | -7361.776241 | -7361.922519 | 0.00       | 0.00           | 0.00       |
| <sup>1</sup> 1•perchlorate<br>{5/2} | -7363.260224 | -7361.749679 | -7361.896411 | 18.61      | 16.67          | 16.38      |
| <sup>1</sup> 2•perchlorate<br>{3/2} | -7362.070036 | -7360.580715 | -7360.723674 | 0.00       | 0.00           | 0.00       |
| <sup>1</sup> 2•perchlorate<br>{5/2} | -7362.041724 | -7360.556466 | -7360.702811 | 17.77      | 15.22          | 13.09      |

## Part 3D: Large Model with picrate Ligand

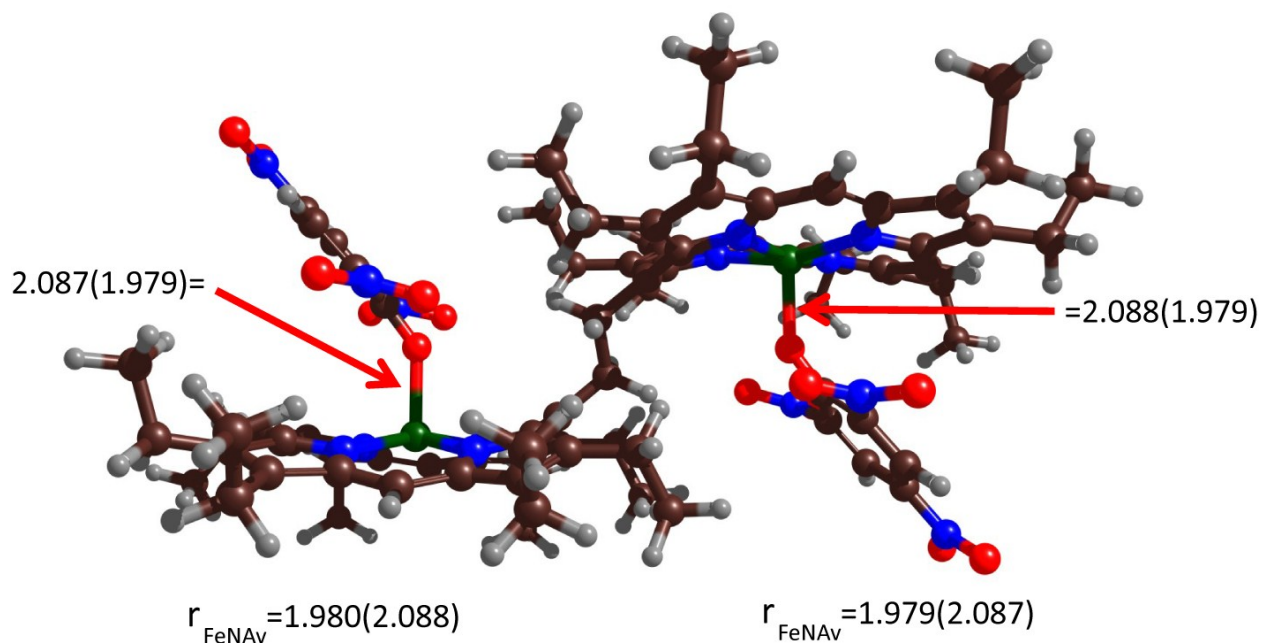

**Fig. S13:** Optimized geometries (distances in Å) of  ${}^71\bullet$ picrate ( ${}^{11}\bullet$ picrate) as obtained at UOPBE/BS1 in Gaussian.

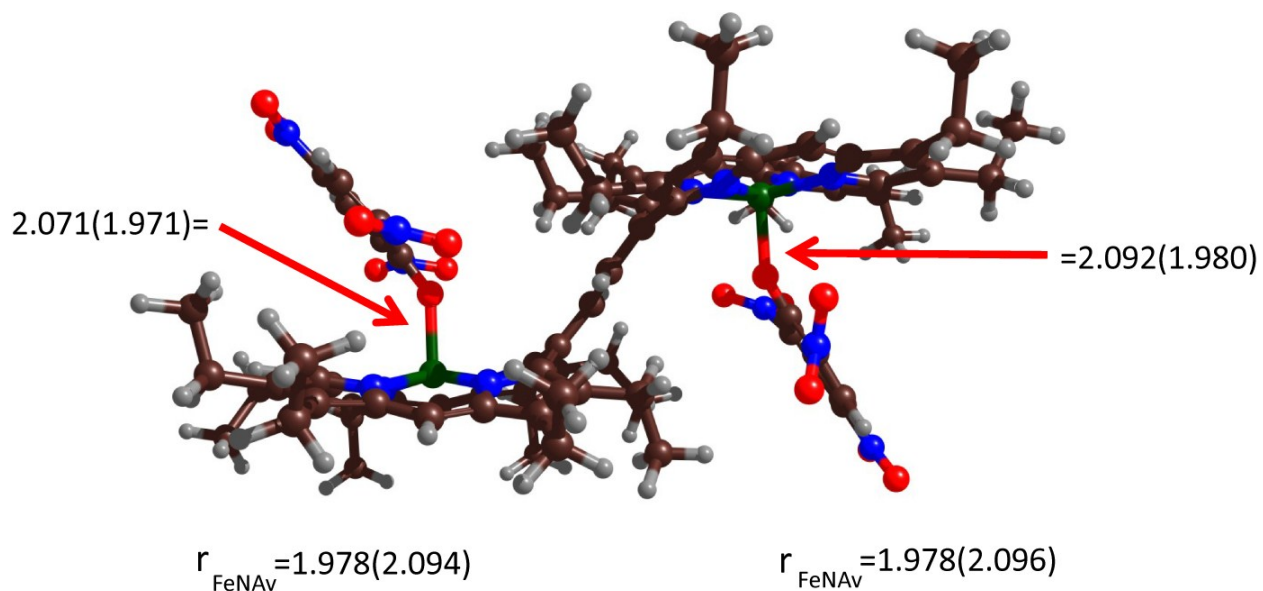

**Fig. S14:** Optimized geometries (distances in Å) of  ${}^72\bullet$ picrate ( ${}^{12}\bullet$ picrate) as obtained at UOPBE/BS1 in Gaussian

**Table S7: Absolute [in au] and relative [in kcal mol<sup>-1</sup>] energies of optimized spin state structures as calculated at OPBE/BS1 with picrate axial ligand.**

| BS1                         | E [au]       | E+ZPE [au] | G [au]       | ΔE   | ΔE+ZPE | ΔG    |
|-----------------------------|--------------|------------|--------------|------|--------|-------|
| <sup>11</sup> 1•picrate     | -5398.321982 | 1.677826   | -5396.817277 | 5.51 | 3.61   | 0.11  |
| <sup>1</sup> 1•picrate{3/2} | -5398.330768 | 1.680855   | -5396.817454 | 0.00 | 0.00   | 0.00  |
| <sup>7</sup> 1•picrate      | -5398.330681 | 1.681025   | -5396.815255 | 0.05 | 0.16   | 1.38  |
| <sup>11</sup> 2•picrate     | -5397.112488 | 1.652628   | -5395.632828 | 3.59 | 1.44   | -1.31 |
| <sup>1</sup> 2•picrate{3/2} | -5397.118212 | 1.656059   | -5395.630740 | 0.00 | 0.00   | 0.00  |
| <sup>7</sup> 2•picrate      | -5397.118031 | 1.656289   | -5395.631338 | 0.11 | 0.26   | -0.38 |

#### Part 4: Computation: Cartesian coordinates

##### Structure <sup>1</sup>1A•perchlorate {3/2}

|    |             |              |              |    |              |              |              |
|----|-------------|--------------|--------------|----|--------------|--------------|--------------|
| Fe | 5.879669000 | 4.638006000  | 1.925337000  | H  | 9.867147000  | 4.895477000  | -1.429749000 |
| Fe | 6.810756000 | -4.440136000 | -2.107909000 | H  | 8.730648000  | 2.501900000  | -1.905216000 |
| Cl | 7.428969000 | 2.323777000  | 3.826597000  | C  | 10.021464000 | -1.906935000 | -3.234369000 |
| N  | 4.739160000 | 3.198727000  | 1.165020000  | H  | 4.033956000  | 0.365051000  | -0.485725000 |
| N  | 4.343960000 | 5.278728000  | 3.053695000  | Cl | 3.940599000  | -2.918306000 | -2.897483000 |
| N  | 6.790817000 | 6.387315000  | 2.319291000  | C  | 8.481843000  | -5.076054000 | -4.570052000 |
| N  | 7.151302000 | 4.302527000  | 0.430205000  | C  | 8.482987000  | -5.911814000 | -5.737805000 |
| O  | 6.798598000 | 3.722721000  | 3.494183000  | C  | 7.390520000  | -6.727674000 | -5.636737000 |
| O  | 6.383072000 | 1.303497000  | 3.633924000  | C  | 6.762336000  | -6.421566000 | -4.382446000 |
| O  | 8.561813000 | 2.117890000  | 2.911043000  | C  | 5.706460000  | -7.141961000 | -3.837612000 |
| C  | 5.126230000 | 2.172841000  | 0.320817000  | H  | 5.254042000  | -7.926566000 | -4.440603000 |
| C  | 4.036603000 | 1.250313000  | 0.139694000  | C  | 5.294546000  | -7.008127000 | -2.518578000 |
| C  | 2.982160000 | 1.733066000  | 0.859257000  | C  | 4.418166000  | -7.924552000 | -1.846020000 |
| C  | 3.434619000 | 2.920403000  | 1.514149000  | C  | 4.392736000  | -7.551274000 | -0.531037000 |
| C  | 2.655820000 | 3.624973000  | 2.420922000  | C  | 5.207794000  | -6.375152000 | -0.420536000 |
| H  | 1.644035000 | 3.265676000  | 2.598386000  | C  | 5.351793000  | -5.622006000 | 0.735090000  |
| C  | 3.100944000 | 4.704166000  | 3.167375000  | H  | 4.869673000  | -5.980961000 | 1.642279000  |
| C  | 2.339682000 | 5.339061000  | 4.205553000  | C  | 5.962962000  | -4.375428000 | 0.780013000  |
| C  | 3.149302000 | 6.293753000  | 4.753041000  | C  | 5.890596000  | -3.498716000 | 1.908490000  |
| C  | 4.383051000 | 6.258261000  | 4.018719000  | C  | 6.427793000  | -2.304373000 | 1.519228000  |
| C  | 5.427680000 | 7.150670000  | 4.210855000  | C  | 6.897815000  | -2.476144000 | 0.169277000  |
| H  | 5.340102000 | 7.877228000  | 5.016238000  | C  | 7.649010000  | -1.528641000 | -0.544958000 |
| C  | 6.532188000 | 7.231153000  | 3.374294000  | C  | 7.656367000  | -0.087423000 | -0.104043000 |
| C  | 7.519674000 | 8.271080000  | 3.443820000  | H  | 7.294437000  | 0.001651000  | 0.921662000  |
| C  | 8.374653000 | 8.070255000  | 2.396963000  | H  | 8.671359000  | 0.328463000  | -0.085829000 |
| C  | 7.922228000 | 6.888179000  | 1.720482000  | C  | 9.372262000  | -4.036299000 | -4.344627000 |
| C  | 8.571832000 | 6.310150000  | 0.641419000  | H  | 10.173585000 | -3.885317000 | -5.065659000 |
| H  | 9.456937000 | 6.810361000  | 0.253234000  | O  | 5.454478000  | -3.298823000 | -3.097217000 |
| C  | 8.217681000 | 5.097080000  | 0.067664000  | O  | 3.911525000  | -1.446720000 | -2.837735000 |
| C  | 8.988746000 | 4.464885000  | -0.957264000 | O  | 3.464540000  | -3.524861000 | -1.647218000 |
| C  | 8.413563000 | 3.247586000  | -1.185378000 | O  | 3.236864000  | -3.438994000 | -4.073746000 |
| C  | 7.264291000 | 3.154103000  | -0.328071000 | H  | 9.216077000  | -5.859722000 | -6.538129000 |
| C  | 6.364761000 | 2.076701000  | -0.332557000 | H  | 7.050275000  | -7.490689000 | -6.331370000 |
| C  | 6.748432000 | 0.788635000  | -1.019082000 | H  | 3.913295000  | -8.761091000 | -2.321113000 |
| H  | 7.258025000 | 0.978384000  | -1.971068000 | H  | 3.851811000  | -8.010894000 | 0.291505000  |
| H  | 5.859638000 | 0.212422000  | -1.286134000 | H  | 5.454864000  | -3.754077000 | 2.870307000  |
| O  | 7.851896000 | 2.426325000  | 5.225795000  | H  | 6.525341000  | -1.413545000 | 2.129964000  |
| H  | 1.984185000 | 1.313373000  | 0.948288000  | H  | 10.867085000 | -1.666894000 | -3.873043000 |
| H  | 1.324082000 | 5.070815000  | 4.483123000  | H  | 9.812417000  | -0.184552000 | -1.884410000 |
| H  | 2.933357000 | 6.978917000  | 5.568198000  | C  | 8.394696000  | -1.917800000 | -1.671345000 |
| H  | 7.536052000 | 9.060327000  | 4.190392000  | C  | 9.472641000  | -1.152625000 | -2.234592000 |
|    |             |              |              | H  | 9.244387000  | 8.655053000  | 2.110452000  |
|    |             |              |              | N  | 6.606676000  | -3.755284000 | -0.266361000 |
|    |             |              |              | N  | 5.760085000  | -6.056578000 | -1.638749000 |

|   |             |              |              |
|---|-------------|--------------|--------------|
| N | 7.431034000 | -5.402456000 | -3.746275000 |
| N | 8.274170000 | -3.115417000 | -2.342491000 |
| C | 9.239172000 | -3.102505000 | -3.323331000 |

### Structure <sup>1</sup>A•perchlorate {5/2}

|    |              |              |              |
|----|--------------|--------------|--------------|
| Fe | 6.038630000  | 4.574587000  | 2.217414000  |
| Fe | 6.573529000  | -4.415701000 | -2.335179000 |
| Cl | 7.437079000  | 2.217243000  | 4.074352000  |
| N  | 4.793264000  | 3.190393000  | 1.291268000  |
| N  | 4.342997000  | 5.390143000  | 3.158514000  |
| N  | 6.875910000  | 6.493765000  | 2.446214000  |
| N  | 7.289818000  | 4.300219000  | 0.569398000  |
| O  | 6.886391000  | 3.676153000  | 3.738188000  |
| O  | 6.303094000  | 1.293545000  | 3.945581000  |
| O  | 8.498366000  | 1.931341000  | 3.102332000  |
| C  | 5.164160000  | 2.202669000  | 0.402140000  |
| C  | 4.068972000  | 1.276413000  | 0.231391000  |
| C  | 3.039306000  | 1.724493000  | 1.009596000  |
| C  | 3.500685000  | 2.908906000  | 1.673584000  |
| C  | 2.733679000  | 3.634673000  | 2.585719000  |
| H  | 1.730789000  | 3.257318000  | 2.781783000  |
| C  | 3.121659000  | 4.778965000  | 3.281723000  |
| C  | 2.307929000  | 5.480053000  | 4.241255000  |
| C  | 3.060664000  | 6.523451000  | 4.705536000  |
| C  | 4.323465000  | 6.463227000  | 4.014381000  |
| C  | 5.354780000  | 7.393732000  | 4.149001000  |
| H  | 5.205766000  | 8.199462000  | 4.866780000  |
| C  | 6.531351000  | 7.421535000  | 3.397315000  |
| C  | 7.526164000  | 8.461193000  | 3.459738000  |
| C  | 8.470023000  | 8.159584000  | 2.516340000  |
| C  | 8.053988000  | 6.929273000  | 1.894653000  |
| C  | 8.748707000  | 6.269693000  | 0.881169000  |
| H  | 9.671603000  | 6.7344457000 | 0.536323000  |
| C  | 8.393972000  | 5.065623000  | 0.271001000  |
| C  | 9.168395000  | 4.431604000  | -0.757308000 |
| C  | 8.532316000  | 3.261421000  | -1.064245000 |
| C  | 7.355078000  | 3.184648000  | -0.234382000 |
| C  | 6.401082000  | 2.143279000  | -0.278049000 |
| C  | 6.739144000  | 0.891353000  | -1.053310000 |
| H  | 7.215392000  | 1.133529000  | -2.011080000 |
| H  | 5.829990000  | 0.348461000  | -1.320150000 |
| O  | 7.930865000  | 2.326853000  | 5.445318000  |
| H  | 2.050397000  | 1.287841000  | 1.119082000  |
| H  | 1.294732000  | 5.205112000  | 4.521969000  |
| H  | 2.785354000  | 7.275755000  | 5.439928000  |
| H  | 7.495533000  | 9.316014000  | 4.130118000  |
| H  | 10.080954000 | 4.831121000  | -1.191402000 |
| H  | 8.834784000  | 2.539513000  | -1.814469000 |
| C  | 9.791788000  | -1.791161000 | -3.559094000 |
| H  | 4.045590000  | 0.405072000  | -0.413195000 |
| Cl | 3.756057000  | -2.934239000 | -3.129892000 |
| C  | 8.474339000  | -5.184505000 | -4.690002000 |
| C  | 8.619637000  | -6.144241000 | -5.754144000 |
| C  | 7.700435000  | -7.130893000 | -5.521818000 |
| C  | 7.015410000  | -6.779786000 | -4.304560000 |
| C  | 6.063834000  | -7.576751000 | -3.662852000 |
| H  | 5.781407000  | -8.506012000 | -4.155952000 |
| C  | 5.511398000  | -7.331681000 | -2.404885000 |
| C  | 4.671092000  | -8.248003000 | -1.677030000 |
| C  | 4.440409000  | -7.682873000 | -0.453051000 |
| C  | 5.119238000  | -6.412346000 | -0.448760000 |
| C  | 5.109182000  | -5.499036000 | 0.604364000  |
| H  | 4.557159000  | -5.785944000 | 1.498536000  |
| C  | 5.697805000  | -4.233233000 | 0.618441000  |
| C  | 5.585991000  | -3.311147000 | 1.711352000  |
| C  | 6.220699000  | -2.161693000 | 1.331410000  |
| C  | 6.755903000  | -2.390716000 | 0.009501000  |
| C  | 7.567816000  | -1.488591000 | -0.714568000 |
| C  | 7.667336000  | -0.060080000 | -0.234631000 |
| H  | 7.393466000  | 0.009362000  | 0.819995000  |
| H  | 8.699910000  | 0.306188000  | -0.281525000 |
| C  | 9.207069000  | -4.004128000 | -4.568652000 |
| H  | 9.959784000  | -3.812801000 | -5.332757000 |
| O  | 5.174279000  | -3.597024000 | -3.439604000 |
| O  | 4.027272000  | -1.516269000 | -2.859671000 |
| O  | 3.190730000  | -3.626473000 | -1.968224000 |
| O  | 2.982038000  | -3.139734000 | -4.352535000 |
| H  | 9.329893000  | -6.068007000 | -6.573188000 |

|   |              |              |              |
|---|--------------|--------------|--------------|
| H | 7.512382000  | -8.024916000 | -6.110388000 |
| H | 4.320400000  | -9.206279000 | -2.050879000 |
| H | 3.858402000  | -8.083428000 | 0.372598000  |
| H | 5.081296000  | -3.510991000 | 2.652610000  |
| H | 6.323204000  | -1.265033000 | 1.932520000  |
| H | 10.583745000 | -1.518982000 | -4.251708000 |
| H | 9.643736000  | -0.084904000 | -2.189642000 |
| C | 8.277005000  | -1.857894000 | -1.881128000 |
| C | 9.301138000  | -1.061381000 | -2.512250000 |
| H | 9.368216000  | 8.716377000  | 2.262842000  |
| N | 6.416564000  | -3.662095000 | -0.406553000 |
| N | 5.760660000  | -6.215104000 | -1.644761000 |
| N | 7.491725000  | -5.586889000 | -3.821260000 |
| N | 8.147252000  | -3.050437000 | -2.553757000 |
| C | 9.051449000  | -3.021242000 | -3.588214000 |

### Structure <sup>1</sup>2A•perchlorate {3/2}

|    |              |              |              |
|----|--------------|--------------|--------------|
| Fe | 5.976308000  | 4.762610000  | 1.974025000  |
| Cl | 8.592738000  | 3.234615000  | 3.334165000  |
| N  | 4.692561000  | 3.286709000  | 1.641628000  |
| N  | 4.767599000  | 5.481791000  | 3.382309000  |
| N  | 6.910064000  | 6.514890000  | 1.970121000  |
| N  | 6.802385000  | 4.310271000  | 0.229079000  |
| O  | 7.108843000  | 3.778036000  | 3.321577000  |
| O  | 8.567651000  | 1.925055000  | 2.666128000  |
| O  | 9.436746000  | 4.200631000  | 2.618795000  |
| C  | 4.921014000  | 2.171775000  | 0.876734000  |
| C  | 3.774157000  | 1.305712000  | 0.907355000  |
| C  | 2.846768000  | 1.908129000  | 1.713703000  |
| C  | 3.445041000  | 3.113160000  | 2.203077000  |
| C  | 2.894392000  | 3.914016000  | 3.195470000  |
| H  | 1.919093000  | 3.633845000  | 3.589223000  |
| C  | 3.555962000  | 4.979409000  | 3.792682000  |
| C  | 3.098679000  | 5.671606000  | 4.964196000  |
| C  | 4.068982000  | 6.579721000  | 5.288147000  |
| C  | 5.085478000  | 6.474515000  | 4.279901000  |
| C  | 6.163136000  | 7.343061000  | 4.153484000  |
| H  | 6.312403000  | 8.092972000  | 4.927861000  |
| C  | 6.967438000  | 7.399919000  | 3.021835000  |
| C  | 7.882982000  | 8.466147000  | 2.727763000  |
| C  | 8.348135000  | 8.246414000  | 1.460842000  |
| C  | 7.757090000  | 7.017518000  | 1.012506000  |
| C  | 8.060661000  | 6.386576000  | -0.186214000 |
| H  | 8.744837000  | 6.889017000  | -0.867352000 |
| C  | 7.648044000  | 5.103243000  | -0.518567000 |
| C  | 8.157715000  | 4.367445000  | -1.633954000 |
| C  | 7.681700000  | 3.090405000  | -1.516320000 |
| C  | 6.819100000  | 3.070911000  | -0.369688000 |
| C  | 6.045380000  | 1.964964000  | 0.047143000  |
| C  | 6.382778000  | 0.635373000  | -0.435434000 |
| H  | 6.797125000  | 0.550144000  | -1.438881000 |
| Fe | 6.675227000  | -4.628960000 | -2.100827000 |
| O  | 8.937215000  | 3.131110000  | 4.755056000  |
| N  | 7.958450000  | -3.152526000 | -1.768546000 |
| N  | 7.884114000  | -5.347666000 | -3.509170000 |
| N  | 5.742293000  | -6.381648000 | -2.096689000 |
| N  | 5.848840000  | -4.176700000 | -0.356054000 |
| C  | 7.729792000  | -2.037771000 | -1.003473000 |
| C  | 8.876557000  | -1.171567000 | -1.033787000 |
| C  | 9.804100000  | -1.773721000 | -1.840150000 |
| C  | 9.206009000  | -2.978726000 | -2.329828000 |
| C  | 9.756810000  | -3.779287000 | -3.322375000 |
| H  | 10.732027000 | -3.498822000 | -3.716123000 |
| C  | 9.095482000  | -4.844771000 | -3.919701000 |
| C  | 9.552798000  | -5.536635000 | -5.091396000 |
| C  | 8.582793000  | -6.445100000 | -5.415266000 |
| C  | 7.566458000  | -6.340421000 | -4.406802000 |
| C  | 6.489278000  | -7.209528000 | -4.280151000 |
| H  | 6.340221000  | -7.959507000 | -5.054501000 |
| C  | 5.685276000  | -7.266820000 | -3.148309000 |
| C  | 4.770461000  | -8.333590000 | -2.853956000 |
| C  | 4.305361000  | -8.113994000 | -1.586990000 |
| C  | 4.895676000  | -6.884655000 | -1.138910000 |
| C  | 4.591567000  | -6.253547000 | 0.059588000  |
| H  | 3.907636000  | -6.756218000 | 0.740802000  |
| C  | 5.003311000  | -4.969836000 | 0.391569000  |
| C  | 4.492958000  | -4.233945000 | 1.506577000  |

|    |              |              |              |
|----|--------------|--------------|--------------|
| C  | 4.968466000  | -2.956736000 | 1.388745000  |
| C  | 5.831499000  | -2.937202000 | 0.242438000  |
| C  | 6.605187000  | -1.831154000 | -0.174155000 |
| C  | 6.267626000  | -0.501604000 | 0.308464000  |
| H  | 5.853319000  | -0.416415000 | 1.311929000  |
| Cl | 4.058646000  | -3.101801000 | -3.461539000 |
| O  | 5.542673000  | -3.644912000 | -3.448746000 |
| O  | 4.083216000  | -1.792482000 | -2.793007000 |
| O  | 3.214673000  | -4.068306000 | -2.746789000 |
| O  | 3.714580000  | -2.997843000 | -4.882496000 |
| H  | 10.487765000 | -5.334534000 | -5.606791000 |
| H  | 8.564901000  | -7.148214000 | -6.243386000 |
| H  | 4.541873000  | -9.157447000 | -3.524341000 |
| H  | 3.606257000  | -8.713751000 | -1.010780000 |
| H  | 3.827233000  | -4.634448000 | 2.265939000  |
| H  | 4.773105000  | -2.125460000 | 2.056667000  |
| H  | 10.805771000 | -1.430755000 | -2.084101000 |
| H  | 8.986049000  | -0.263259000 | -0.450881000 |
| H  | 8.823340000  | 4.767878000  | -2.393441000 |
| H  | 7.876424000  | 2.259243000  | -2.184572000 |
| H  | 9.047709000  | 8.845792000  | 0.884808000  |
| H  | 8.111965000  | 9.289782000  | 3.398285000  |
| H  | 4.086994000  | 7.282929000  | 6.116184000  |
| H  | 2.163537000  | 5.469924000  | 5.479436000  |
| H  | 1.845081000  | 1.565325000  | 1.957819000  |
| H  | 3.664465000  | 0.397324000  | 0.324615000  |

### Structure 1<sup>2A</sup>-perchlorate {5/2}

|    |              |              |              |
|----|--------------|--------------|--------------|
| Fe | 6.177746000  | 4.714226000  | 2.239822000  |
| Cl | 8.785312000  | 3.268512000  | 3.576031000  |
| N  | 4.779658000  | 3.208095000  | 1.836268000  |
| N  | 4.757499000  | 5.575159000  | 3.516280000  |
| N  | 6.919588000  | 6.657564000  | 2.014634000  |
| N  | 6.895587000  | 4.293509000  | 0.318630000  |
| O  | 7.322082000  | 3.916728000  | 3.605314000  |
| O  | 8.653159000  | 1.994452000  | 2.861389000  |
| O  | 9.661781000  | 4.215478000  | 2.880812000  |
| C  | 4.976683000  | 2.128495000  | 1.023870000  |
| C  | 3.835265000  | 1.247617000  | 1.090887000  |
| C  | 2.955613000  | 1.809553000  | 1.976979000  |
| C  | 3.564434000  | 3.018636000  | 2.456217000  |
| C  | 3.028314000  | 3.838560000  | 3.450562000  |
| H  | 2.083266000  | 3.517820000  | 3.887972000  |
| C  | 3.596353000  | 5.005012000  | 3.969400000  |
| C  | 3.061591000  | 5.774039000  | 5.063518000  |
| C  | 3.926796000  | 6.813927000  | 5.274044000  |
| C  | 4.966456000  | 6.692614000  | 4.284337000  |
| C  | 5.974464000  | 7.634859000  | 4.054660000  |
| H  | 6.019519000  | 8.485911000  | 4.733479000  |
| C  | 6.849876000  | 7.645135000  | 2.965349000  |
| C  | 7.722493000  | 8.735694000  | 2.610499000  |
| C  | 8.291837000  | 8.407678000  | 1.410080000  |
| C  | 7.788856000  | 7.104953000  | 1.055829000  |
| C  | 8.156609000  | 6.379364000  | -0.080084000 |
| H  | 8.864245000  | 6.855970000  | -0.757663000 |
| C  | 7.759194000  | 5.083515000  | -0.409592000 |
| C  | 8.265047000  | 4.345289000  | -1.531443000 |
| C  | 7.740303000  | 3.084545000  | -1.446891000 |
| C  | 6.871618000  | 3.069653000  | -0.296373000 |
| C  | 6.077456000  | 1.965980000  | 0.132945000  |
| C  | 6.393146000  | 0.656707000  | -0.404227000 |
| H  | 6.814651000  | 0.614571000  | -1.406876000 |
| Fe | 6.473628000  | -4.580468000 | -2.366784000 |
| O  | 9.127752000  | 3.100448000  | 4.987031000  |
| N  | 7.871788000  | -3.074442000 | -1.963102000 |
| N  | 7.893954000  | -5.441481000 | -3.643107000 |
| N  | 5.731790000  | -6.523832000 | -2.141526000 |
| N  | 5.755934000  | -4.159846000 | -0.445471000 |
| C  | 7.674736000  | -1.994800000 | -1.150769000 |
| C  | 8.816162000  | -1.113931000 | -1.217766000 |
| C  | 9.695865000  | -1.675934000 | -2.103768000 |
| C  | 9.087051000  | -2.885017000 | -2.583000000 |
| C  | 9.623211000  | -3.704968000 | -3.577310000 |
| H  | 10.568296000 | -3.384260000 | -4.014655000 |
| C  | 9.055155000  | -4.871396000 | -4.096168000 |
| C  | 9.589912000  | -5.640433000 | -5.190281000 |
| C  | 8.724655000  | -6.680267000 | -5.400859000 |
| C  | 7.684956000  | -6.558905000 | -4.411198000 |

|    |              |              |              |
|----|--------------|--------------|--------------|
| C  | 6.676890000  | -7.501100000 | -4.181572000 |
| H  | 6.631805000  | -8.352134000 | -4.860412000 |
| C  | 5.801485000  | -7.511381000 | -3.092253000 |
| C  | 4.928935000  | -8.601989000 | -2.737368000 |
| C  | 4.359642000  | -8.274010000 | -1.536916000 |
| C  | 4.862613000  | -6.971278000 | -1.182667000 |
| C  | 4.494954000  | -6.245726000 | -0.046704000 |
| H  | 3.787381000  | -6.722352000 | 0.630927000  |
| C  | 4.892422000  | -4.949895000 | 0.282820000  |
| C  | 4.386696000  | -4.211173000 | 1.404767000  |
| C  | 4.911372000  | -2.950958000 | 1.320179000  |
| C  | 5.779918000  | -2.936013000 | 0.169563000  |
| C  | 6.573971000  | -1.832283000 | -0.259824000 |
| C  | 6.258245000  | -0.523019000 | 0.277307000  |
| H  | 5.836698000  | -0.480884000 | 1.279941000  |
| Cl | 3.866579000  | -3.134674000 | -3.703384000 |
| O  | 5.329230000  | -3.784186000 | -3.732938000 |
| O  | 4.000010000  | -1.860551000 | -2.989091000 |
| O  | 2.989522000  | -4.080733000 | -3.007662000 |
| O  | 3.523856000  | -2.966677000 | -5.114319000 |
| H  | 10.505103000 | -5.410611000 | -5.729518000 |
| H  | 8.795358000  | -7.472538000 | -6.141393000 |
| H  | 4.790129000  | -9.508496000 | -3.320453000 |
| H  | 3.656887000  | -8.856246000 | -0.946872000 |
| H  | 3.707056000  | -4.600712000 | 2.158129000  |
| H  | 4.736095000  | -2.134420000 | 2.011740000  |
| H  | 10.679221000 | -1.311426000 | -2.388580000 |
| H  | 8.965356000  | -0.226693000 | -0.611793000 |
| H  | 8.944811000  | 4.734217000  | -2.284721000 |
| H  | 7.915662000  | 2.267977000  | -2.138394000 |
| H  | 8.994646000  | 8.989883000  | 0.820068000  |
| H  | 7.861313000  | 9.642200000  | 3.193583000  |
| H  | 3.856075000  | 7.606204000  | 6.014570000  |
| H  | 2.146433000  | 5.544174000  | 5.602792000  |
| H  | 1.972288000  | 1.445007000  | 2.261850000  |
| H  | 3.686053000  | 0.360390000  | 0.484901000  |

### Structure 1<sup>1</sup>-perchlorate {3/2}

|    |              |              |              |
|----|--------------|--------------|--------------|
| Fe | 5.725202000  | 4.389216000  | 1.824139000  |
| C  | 4.231356000  | 2.159397000  | 0.478368000  |
| C  | 2.898889000  | 1.588970000  | 0.342635000  |
| C  | 2.087518000  | 2.302861000  | 1.212734000  |
| C  | 2.934471000  | 3.255649000  | 1.878568000  |
| C  | 2.567136000  | 3.974746000  | 3.009240000  |
| H  | 1.564788000  | 3.815442000  | 3.394888000  |
| C  | 3.413534000  | 4.799677000  | 3.737446000  |
| C  | 3.098382000  | 5.393040000  | 5.017488000  |
| C  | 4.226462000  | 6.092514000  | 5.405770000  |
| C  | 5.178207000  | 5.952437000  | 4.326625000  |
| C  | 6.376844000  | 6.648222000  | 4.233919000  |
| H  | 6.671861000  | 7.265843000  | 5.07515000   |
| C  | 7.147671000  | 6.712233000  | 3.080417000  |
| C  | 8.203556000  | 7.671194000  | 2.849616000  |
| C  | 8.574689000  | 7.526385000  | 1.525078000  |
| C  | 7.790641000  | 6.429448000  | 1.004233000  |
| C  | 7.954916000  | 5.862330000  | -0.251448000 |
| H  | 8.672035000  | 6.326846000  | -0.920863000 |
| C  | 7.393714000  | 4.656504000  | -0.657212000 |
| C  | 7.828171000  | 3.920834000  | -1.813301000 |
| C  | 7.225773000  | 2.675469000  | -1.745372000 |
| C  | 6.351789000  | 2.712064000  | -0.582087000 |
| C  | 5.396423000  | 1.741009000  | -0.210680000 |
| C  | 2.396863000  | 0.615745000  | -0.690989000 |
| H  | 1.548743000  | 0.056286000  | -0.269274000 |
| H  | 3.138589000  | -0.141738000 | -0.954134000 |
| C  | 1.946294000  | 1.295391000  | -1.993433000 |
| H  | 1.639166000  | 0.533473000  | -2.722461000 |
| H  | 2.764951000  | 1.873390000  | -2.440776000 |
| H  | 1.104073000  | 1.978775000  | -1.827618000 |
| C  | 0.612793000  | 2.153527000  | 1.448595000  |
| H  | 0.427458000  | 2.062239000  | 2.531782000  |
| H  | 0.271481000  | 1.203677000  | 1.015452000  |
| C  | -0.252317000 | 3.293608000  | 0.891768000  |
| H  | -1.313393000 | 3.113675000  | 1.117269000  |
| H  | -0.148389000 | 3.376961000  | -0.197455000 |
| H  | 0.026886000  | 4.263278000  | 1.324253000  |
| C  | 1.796566000  | 5.243450000  | 5.748619000  |









|    |             |              |              |   |              |             |              |
|----|-------------|--------------|--------------|---|--------------|-------------|--------------|
| H  | 4.519433000 | -8.945526000 | -4.962874000 | H | 0.715015000  | 0.746337000 | 1.644062000  |
| H  | 3.074788000 | -9.230363000 | -4.014461000 | C | -0.064933000 | 2.709175000 | 1.205231000  |
| C  | 2.848204000 | -7.679872000 | -5.503550000 | H | -1.091277000 | 2.448351000 | 1.501537000  |
| H  | 2.504576000 | -8.370016000 | -6.287633000 | H | 0.005268000  | 2.618425000 | 0.113827000  |
| H  | 1.964462000 | -7.218448000 | -5.044404000 | H | 0.104377000  | 3.763845000 | 1.459709000  |
| H  | 3.422141000 | -6.874432000 | -5.979467000 | C | 1.604742000  | 5.634421000 | 5.594446000  |
| C  | 2.627490000 | -8.132242000 | -1.401112000 | H | 1.654697000  | 5.989194000 | 6.633927000  |
| H  | 2.518661000 | -9.128924000 | -1.853899000 | H | 1.321815000  | 4.572055000 | 5.662208000  |
| H  | 2.879460000 | -8.319085000 | -0.345769000 | C | 0.495699000  | 6.404052000 | 4.861652000  |
| C  | 1.279405000 | -7.400819000 | -1.478057000 | H | -0.469964000 | 6.262504000 | 5.368294000  |
| H  | 0.502365000 | -7.971791000 | -0.949347000 | H | 0.385900000  | 6.065793000 | 3.822730000  |
| H  | 1.337367000 | -6.401598000 | -1.027489000 | H | 0.709664000  | 7.480544000 | 4.835798000  |
| H  | 0.956473000 | -7.271228000 | -2.518811000 | C | 4.066903000  | 7.555520000 | 6.479348000  |
| C  | 3.655222000 | -4.592386000 | 2.538579000  | H | 5.070117000  | 7.531372000 | 6.932311000  |
| H  | 3.741800000 | -5.688220000 | 2.586870000  | H | 3.382322000  | 7.225772000 | 7.274541000  |
| H  | 3.958909000 | -4.234043000 | 3.532405000  | C | 3.720975000  | 9.002109000 | 6.096211000  |
| C  | 2.187697000 | -4.207495000 | 2.298161000  | H | 3.801870000  | 9.661792000 | 6.972344000  |
| H  | 1.543890000 | -4.639819000 | 3.077914000  | H | 2.696083000  | 9.077279000 | 5.710242000  |
| H  | 2.055354000 | -3.117686000 | 2.315543000  | H | 4.394478000  | 9.386383000 | 5.318580000  |
| H  | 1.830812000 | -4.564756000 | 1.323331000  | C | 8.786205000  | 8.898948000 | 4.150139000  |
| C  | 5.187259000 | -1.830845000 | 2.632815000  | H | 7.900657000  | 9.415070000 | 4.553491000  |
| H  | 5.231162000 | -0.802467000 | 2.260273000  | H | 9.368337000  | 9.677237000 | 3.635675000  |
| H  | 4.211436000 | -1.917985000 | 3.131306000  | C | 9.617165000  | 8.340825000 | 5.315344000  |
| C  | 6.296248000 | -2.041756000 | 3.674517000  | H | 9.887108000  | 9.145384000 | 6.014683000  |
| H  | 6.230801000 | -1.277131000 | 4.459907000  | H | 10.544762000 | 7.878488000 | 4.954109000  |
| H  | 6.221912000 | -3.032370000 | 4.143955000  | H | 9.066122000  | 7.572310000 | 5.873236000  |
| H  | 7.292000000 | -1.963529000 | 3.221433000  | C | 10.085304000 | 8.223403000 | 1.255170000  |
| C  | 6.666908000 | -0.360741000 | 0.324120000  | H | 10.178697000 | 9.256272000 | 1.621401000  |
| H  | 7.053973000 | 0.060544000  | 1.254216000  | H | 9.890119000  | 8.314019000 | 0.175194000  |
| O  | 5.901862000 | -2.930120000 | -3.277915000 | C | 11.423026000 | 7.498620000 | 1.466928000  |
| O  | 3.470245000 | -3.180074000 | -2.974097000 | H | 12.230798000 | 8.019277000 | 0.932387000  |
| Cl | 4.496461000 | -2.733258000 | -3.931453000 | H | 11.382870000 | 6.463812000 | 1.102627000  |
| O  | 4.400474000 | -1.287575000 | -4.195258000 | H | 11.689730000 | 7.460508000 | 2.530893000  |
| O  | 4.464751000 | -3.520368000 | -5.173114000 | C | 9.168207000  | 4.501933000 | -2.543553000 |
| O  | 6.638138000 | 2.951120000  | 3.087599000  | H | 9.120051000  | 5.600073000 | -2.596617000 |
| O  | 9.082304000 | 3.194858000  | 2.913299000  | H | 8.886238000  | 4.151819000 | -3.546736000 |
| Cl | 8.005929000 | 2.756232000  | 3.817752000  | C | 10.613715000 | 4.070306000 | -2.254652000 |
| O  | 7.974470000 | 3.549539000  | 5.055473000  | H | 11.297380000 | 4.481088000 | -3.011865000 |
| O  | 8.081223000 | 1.311658000  | 4.092993000  | H | 10.710634000 | 2.976623000 | -2.268647000 |
| Fe | 6.769112000 | -4.416243000 | -2.110781000 | H | 10.949796000 | 4.416307000 | -1.268162000 |

### Structure <sup>12</sup>-perchlorate {5/2}

|    |             |              |              |   |              |              |              |
|----|-------------|--------------|--------------|---|--------------|--------------|--------------|
| Fe | 6.015306000 | 4.357920000  | 2.201511000  | H | 5.520754000  | 0.015778000  | -1.392903000 |
| C  | 4.491945000 | 2.114503000  | 0.732685000  | N | 4.402933000  | 3.202560000  | 1.566507000  |
| C  | 3.225312000 | 1.388488000  | 0.724617000  | N | 4.713882000  | 5.358652000  | 3.498525000  |
| C  | 2.382745000 | 2.077363000  | 1.581778000  | N | 7.159588000  | 6.087967000  | 2.259668000  |
| C  | 3.151478000 | 3.171761000  | 2.128853000  | N | 6.786884000  | 3.972706000  | 0.310601000  |
| C  | 2.712961000 | 3.999829000  | 3.164032000  | N | 8.161862000  | -3.157530000 | -1.706620000 |
| H  | 1.708909000 | 3.809088000  | 3.532648000  | N | 7.854551000  | -5.272118000 | -3.681528000 |
| C  | 3.433980000 | 4.996303000  | 3.823303000  | N | 5.421772000  | -6.043218000 | -2.445411000 |
| C  | 2.963436000 | 5.753028000  | 4.968570000  | N | 5.782264000  | -3.957549000 | -0.463739000 |
| C  | 4.010274000 | 6.575958000  | 5.343889000  | C | 8.070092000  | -2.086401000 | -0.851951000 |
| C  | 5.080007000 | 6.326597000  | 4.396565000  | C | 9.337453000  | -1.362259000 | -0.822266000 |
| C  | 6.288209000 | 7.025277000  | 4.342454000  | C | 10.183443000 | -2.034817000 | -1.689072000 |
| H  | 6.462851000 | 7.760694000  | 5.122885000  | C | 9.415529000  | -3.115967000 | -2.263439000 |
| C  | 7.238885000 | 6.954044000  | 3.322189000  | C | 9.854144000  | -3.918731000 | -3.318247000 |
| C  | 8.355631000 | 7.861633000  | 3.156114000  | H | 10.857991000 | -3.719095000 | -3.682754000 |
| C  | 8.913119000 | 7.567295000  | 1.923249000  | C | 9.132317000  | -4.898553000 | -4.001540000 |
| C  | 8.150983000 | 6.457536000  | 1.387091000  | C | 9.599868000  | -5.624301000 | -5.167839000 |
| C  | 8.385953000 | 5.831567000  | 0.162414000  | C | 8.553557000  | -6.440298000 | -5.559823000 |
| H  | 9.181501000 | 6.249286000  | -0.448366000 | C | 7.487447000  | -6.218778000 | -4.601577000 |
| C  | 7.768270000 | 4.682694000  | -0.334982000 | C | 6.283034000  | -6.925172000 | -4.556298000 |
| C  | 8.164908000 | 4.000543000  | -1.544498000 | H | 6.106831000  | -7.642276000 | -5.353280000 |
| C  | 7.463284000 | 2.807977000  | -1.577768000 | C | 5.340434000  | -6.885621000 | -3.526620000 |
| C  | 6.601355000 | 2.812535000  | -0.400056000 | C | 4.232096000  | -7.805659000 | -3.371560000 |
| C  | 5.642475000 | 1.825278000  | -0.048308000 | C | 3.682762000  | -7.543180000 | -2.127892000 |
| C  | 2.825650000 | 0.226121000  | -0.137235000 | C | 4.439257000  | -6.437927000 | -1.574203000 |
| H  | 2.001745000 | -0.310571000 | 0.354932000  | C | 4.202263000  | -5.833809000 | -0.338789000 |
| H  | 3.640382000 | -0.502204000 | -0.208360000 | H | 3.412579000  | -6.268748000 | 0.267572000  |
| C  | 2.373396000 | 0.619236000  | -1.551289000 | C | 4.807359000  | -4.684193000 | 0.172732000  |
| H  | 2.129160000 | -0.278864000 | -2.133385000 | C | 4.402555000  | -4.018386000 | 1.388930000  |
| H  | 3.159522000 | 1.160697000  | -2.091772000 | C | 5.092233000  | -2.819118000 | 1.435573000  |
| H  | 1.486892000 | 1.266029000  | -1.522768000 | C | 5.957237000  | -2.804178000 | 0.260492000  |
| C  | 0.945677000 | 1.788453000  | 1.904986000  | C | 6.914095000  | -1.809554000 | -0.073960000 |
| H  | 0.796443000 | 1.854561000  | 2.994893000  |   |              |              |              |



















|   |              |              |              |
|---|--------------|--------------|--------------|
| H | -1.525751000 | 4.962730000  | -1.813402000 |
| C | -2.351040000 | 3.460153000  | -0.500729000 |
| H | -2.754207000 | 2.851625000  | -1.322977000 |
| H | -1.385645000 | 3.029729000  | -0.204533000 |
| H | -3.031021000 | 3.366179000  | 0.356450000  |
| C | -6.729182000 | 5.325352000  | 2.027728000  |
| H | -6.168148000 | 4.523146000  | 1.521876000  |
| H | -7.458113000 | 4.811871000  | 2.670190000  |
| C | -7.487651000 | 6.151723000  | 0.978266000  |
| H | -8.179811000 | 5.510904000  | 0.413635000  |
| H | -8.069331000 | 6.954245000  | 1.449794000  |
| H | -6.802928000 | 6.623476000  | 0.261316000  |
| C | -7.110880000 | 6.192864000  | 5.131123000  |
| H | -7.565036000 | 5.239005000  | 4.825404000  |
| H | -6.725879000 | 6.016319000  | 6.147444000  |
| C | -8.203004000 | 7.271469000  | 5.183145000  |
| H | -8.994263000 | 6.979634000  | 5.888711000  |
| H | -7.798508000 | 8.240880000  | 5.501473000  |
| H | -8.662104000 | 7.420611000  | 4.197751000  |
| C | -4.250656000 | 9.407627000  | 8.507630000  |
| H | -4.457545000 | 8.334218000  | 8.632749000  |
| H | -3.625880000 | 9.689184000  | 9.365946000  |
| C | -5.568894000 | 10.194103000 | 8.580803000  |
| H | -6.095039000 | 9.974141000  | 9.520978000  |
| H | -5.386273000 | 11.276121000 | 8.541807000  |
| H | -6.237261000 | 9.941268000  | 7.747054000  |
| C | -1.937533000 | 11.563031000 | 7.981394000  |
| H | -1.476472000 | 12.425433000 | 7.488326000  |
| H | -2.715800000 | 11.975116000 | 8.640536000  |
| C | -0.871022000 | 10.864574000 | 8.840477000  |
| H | -0.445829000 | 11.576619000 | 9.560163000  |
| H | -1.286191000 | 10.020140000 | 9.405726000  |
| H | -0.055999000 | 10.473265000 | 8.217809000  |
| C | -1.306745000 | 12.679369000 | 4.800574000  |
| H | -0.513817000 | 13.187902000 | 4.261024000  |
| O | -0.175603000 | 16.225989000 | 7.509596000  |
| C | 0.724569000  | 15.916603000 | 8.348983000  |
| C | 0.440781000  | 15.431762000 | 9.687025000  |
| O | -1.767208000 | 16.089488000 | 9.833456000  |
| N | -0.943682000 | 15.233577000 | 10.126888000 |
| C | 2.148935000  | 15.959611000 | 8.070624000  |
| N | 2.634923000  | 16.233911000 | 6.716421000  |
| O | 2.024791000  | 15.719444000 | 5.785314000  |
| O | 3.653368000  | 16.915663000 | 6.605704000  |
| C | 3.128712000  | 15.707147000 | 9.017634000  |
| H | 4.178775000  | 15.813994000 | 8.755743000  |
| C | 2.763303000  | 15.279550000 | 10.294853000 |
| C | 1.416628000  | 15.100529000 | 10.613428000 |
| H | 1.133012000  | 14.717039000 | 11.590722000 |
| O | -1.178655000 | 14.219933000 | 10.787344000 |
| N | 3.790489000  | 14.989923000 | 11.286565000 |
| O | 3.418019000  | 14.612892000 | 12.397649000 |
| O | 4.965063000  | 15.142744000 | 10.950625000 |
| O | -3.178138000 | 10.029240000 | 2.084074000  |
| C | -3.914970000 | 10.241204000 | 1.071152000  |
| C | -3.408783000 | 10.271230000 | -0.286544000 |
| O | -1.252120000 | 10.910567000 | 0.197755000  |
| N | -1.963493000 | 10.227098000 | -0.529844000 |
| C | -5.349842000 | 10.433548000 | 1.142095000  |
| N | -6.014754000 | 10.557077000 | 2.440521000  |
| O | -7.157366000 | 10.107901000 | 2.538391000  |
| O | -5.405520000 | 11.133739000 | 3.335059000  |
| C | -6.164293000 | 10.532509000 | 0.024146000  |
| H | -7.239348000 | 10.643921000 | 0.143195000  |
| C | -5.598745000 | 10.496613000 | -1.250789000 |
| C | -4.216817000 | 10.362047000 | -1.406801000 |
| H | -3.777730000 | 10.340076000 | -2.401584000 |
| O | -1.570681000 | 9.540363000  | -1.471622000 |
| N | -6.453429000 | 10.607985000 | -2.426579000 |
| O | -5.909896000 | 10.565361000 | -3.530255000 |
| O | -7.663806000 | 10.732981000 | -2.241091000 |
